# Supplementary material for: Cytotoxic Polyketides from the Deep-Sea-Derived Fungus Engyodontium album DFFSCS021
Source: PubMed Central journal article supplement (PMC4278208; doi:10.3390/md12125902), 2014-12-09
Supplement: marinedrugs-12-05902-s001.pdf [file marinedrugs-12-05902-s001.pdf]

## Supplementary Information

| Contents                                                                 | page |
|--------------------------------------------------------------------------|------|
| <b>Figure S1.</b> $^1\text{H}$ NMR spectrum of <b>1</b>                  | 3    |
| <b>Figure S2.</b> $^{13}\text{C}$ NMR spectrum of <b>1</b>               | 3    |
| <b>Figure S3.</b> HMBC spectrum of <b>1</b>                              | 4    |
| <b>Figure S4.</b> HRESIMS spectrum of <b>1</b>                           | 4    |
| <b>Figure S5.</b> IR spectrum of <b>1</b>                                | 5    |
| <b>Figure S6.</b> $^1\text{H}$ NMR spectrum of <b>2</b>                  | 5    |
| <b>Figure S7.</b> $^{13}\text{C}$ NMR spectra of <b>2</b>                | 6    |
| <b>Figure S8.</b> HMBC spectrum of <b>2</b>                              | 6    |
| <b>Figure S9.</b> HRESIMS spectrum of <b>2</b>                           | 7    |
| <b>Figure S10.</b> IR spectrum of <b>2</b>                               | 7    |
| <b>Figure S11.</b> $^1\text{H}$ NMR spectrum of <b>3</b>                 | 8    |
| <b>Figure S12.</b> $^{13}\text{C}$ NMR spectra of <b>3</b>               | 8    |
| <b>Figure S13.</b> HSQC spectrum of <b>3</b>                             | 9    |
| <b>Figure S14.</b> HMBC spectrum of <b>3</b>                             | 9    |
| <b>Figure S15.</b> NOESY spectrum of <b>3</b>                            | 10   |
| <b>Figure S16.</b> HRESIMS spectrum of <b>3</b>                          | 10   |
| <b>Figure S17.</b> IR spectrum of <b>3</b>                               | 11   |
| <b>Figure S18.</b> $^1\text{H}$ NMR spectrum of <b>4</b>                 | 11   |
| <b>Figure S19.</b> $^{13}\text{C}$ NMR spectra of <b>4</b>               | 12   |
| <b>Figure S20.</b> HSQC spectrum of <b>4</b>                             | 12   |
| <b>Figure S21.</b> HMBC spectrum of <b>4</b>                             | 13   |
| <b>Figure S22.</b> NOESY spectrum of <b>4</b>                            | 13   |
| <b>Figure S23.</b> HRESIMS spectrum of <b>4</b>                          | 14   |
| <b>Figure S24.</b> IR spectrum of <b>4</b>                               | 14   |
| <b>Figure S25.</b> $^1\text{H}$ NMR spectrum of <b>5</b>                 | 15   |
| <b>Figure S26.</b> $^{13}\text{C}$ NMR spectra of <b>5</b>               | 15   |
| <b>Figure S27.</b> HMBC spectrum of <b>5</b>                             | 16   |
| <b>Figure S28.</b> NOESY spectrum of <b>5</b>                            | 16   |
| <b>Figure S29.</b> HRESIMS spectrum of <b>5</b>                          | 17   |
| <b>Figure S30.</b> IR spectrum of <b>5</b>                               | 17   |
| <b>Figure S31.</b> $^1\text{H}$ NMR spectrum of <b>6</b>                 | 18   |
| <b>Figure S32.</b> $^{13}\text{C}$ NMR spectra of <b>6</b>               | 18   |
| <b>Figure S33.</b> HSQC spectrum of <b>6</b>                             | 19   |
| <b>Figure S34.</b> HMBC spectrum of <b>6</b>                             | 19   |
| <b>Figure S35.</b> $^1\text{H}$ - $^1\text{H}$ COSY spectrum of <b>6</b> | 20   |
| <b>Figure S36.</b> NOESY spectrum of <b>6</b>                            | 20   |
| <b>Figure S37.</b> HRESIMS spectrum of <b>6</b>                          | 21   |
| <b>Figure S38.</b> IR spectrum of <b>6</b>                               | 21   |
| <b>Figure S39.</b> $^1\text{H}$ NMR spectrum of <b>7</b>                 | 22   |
| <b>Figure S40.</b> $^{13}\text{C}$ NMR spectra of <b>7</b>               | 22   |

|                                                                                               |    |
|-----------------------------------------------------------------------------------------------|----|
| <b>Figure S41.</b> HSQC spectrum of <b>7</b>                                                  | 23 |
| <b>Figure S42.</b> HMBC spectrum of <b>7</b>                                                  | 23 |
| <b>Figure S43.</b> NOESY spectrum of <b>7</b>                                                 | 24 |
| <b>Figure S44.</b> HRESIMS spectrum of <b>7</b>                                               | 24 |
| <b>Figure S45.</b> IR spectrum of <b>7</b>                                                    | 25 |
| <b>Figure S46.</b> <sup>1</sup> H NMR spectrum of <b>8</b>                                    | 25 |
| <b>Figure S47.</b> <sup>13</sup> C NMR spectra of <b>8</b>                                    | 26 |
| <b>Figure S48.</b> HMBC spectrum of <b>8</b>                                                  | 26 |
| <b>Figure S49.</b> NOESY spectrum of <b>8</b>                                                 | 27 |
| <b>Figure S50.</b> HRESIMS spectrum of <b>8</b>                                               | 27 |
| <b>Figure S51.</b> IR spectrum of <b>8</b>                                                    | 28 |
| <b>Figure S52.</b> <sup>1</sup> H NMR spectrum of <b>9</b>                                    | 28 |
| <b>Figure S53.</b> <sup>13</sup> C NMR spectra of <b>9</b>                                    | 29 |
| <b>Figure S54.</b> HMBC spectrum of <b>9</b>                                                  | 29 |
| <b>Figure S55.</b> HRESIMS spectrum of <b>9</b>                                               | 30 |
| <b>Figure S56.</b> IR spectrum of <b>9</b>                                                    | 30 |
| <b>Figure S57.</b> <sup>1</sup> H NMR spectrum of <b>10</b>                                   | 31 |
| <b>Figure S58.</b> <sup>13</sup> C NMR spectra of <b>10</b>                                   | 31 |
| <b>Figure S59.</b> HMBC spectrum of <b>10</b>                                                 | 32 |
| <b>Figure S60.</b> <sup>1</sup> H- <sup>1</sup> H COSY spectrum of <b>10</b>                  | 32 |
| <b>Figure S61.</b> HRESIMS spectrum of <b>10</b>                                              | 33 |
| <b>Figure S62.</b> IR spectrum of <b>10</b>                                                   | 33 |
| <b>Figure S63.</b> <sup>1</sup> H NMR spectrum of <b>11</b>                                   | 34 |
| <b>Figure S64.</b> <sup>13</sup> C NMR spectra of <b>11</b>                                   | 34 |
| <b>Figure S65.</b> HMBC spectrum of <b>11</b>                                                 | 35 |
| <b>Figure S66.</b> HRESIMS spectrum of <b>11</b>                                              | 35 |
| <b>Figure S67.</b> IR spectrum of <b>11</b>                                                   | 36 |
| <b>Figure S68.</b> HPLC analysis of compound <b>5</b> on a chiral column (IPA/n-hexane 30:70) | 37 |
| <b>Figure S69.</b> HPLC analysis of compound <b>6</b> on a chiral column (IPA/n-hexane 30:70) | 38 |
| <b>Figure S70.</b> HPLC analysis of compound <b>7</b> on a chiral column (IPA/n-hexane 22:78) | 39 |
| <b>Figure S71.</b> Macro- and micro-morphological observations of strain DFFSCS021            | 40 |

Figure S1. <sup>1</sup>H NMR spectrum of 1.

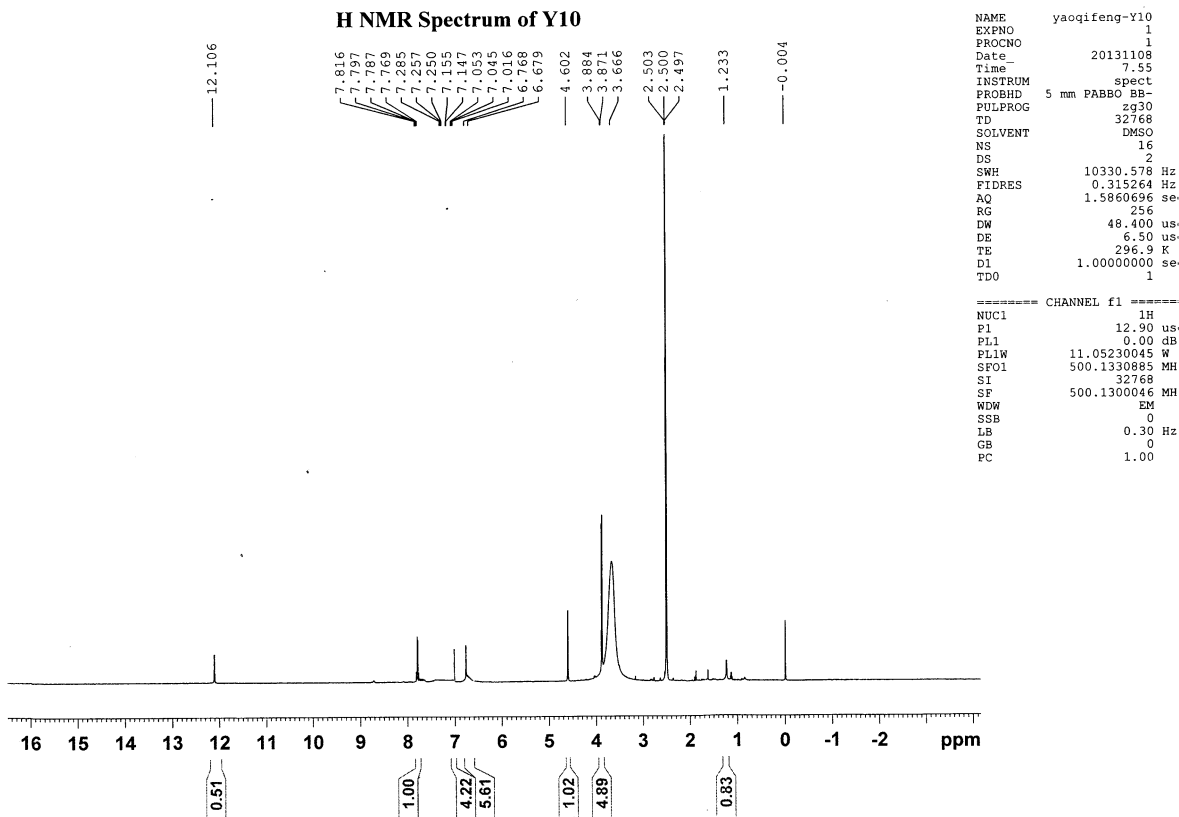

Figure S2. <sup>13</sup>C NMR spectrum of 1.

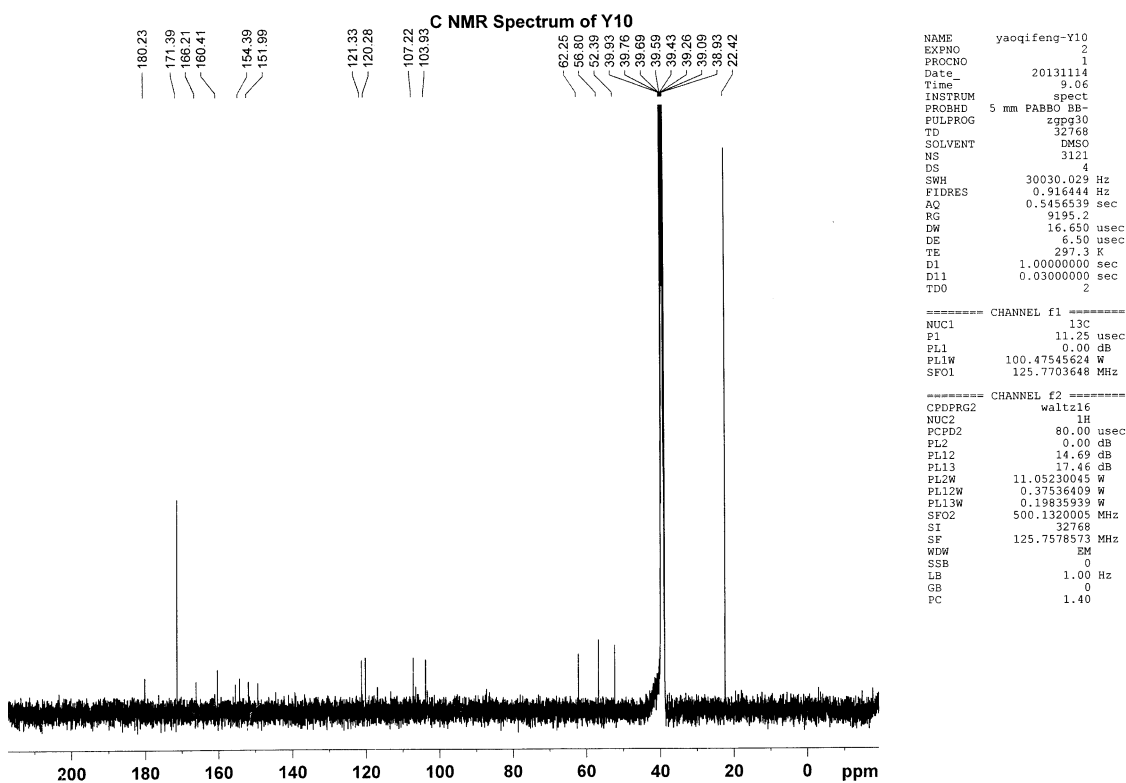

Figure S3. HMBC spectrum of 1 and partial enlarged view for the assignment of C-13.

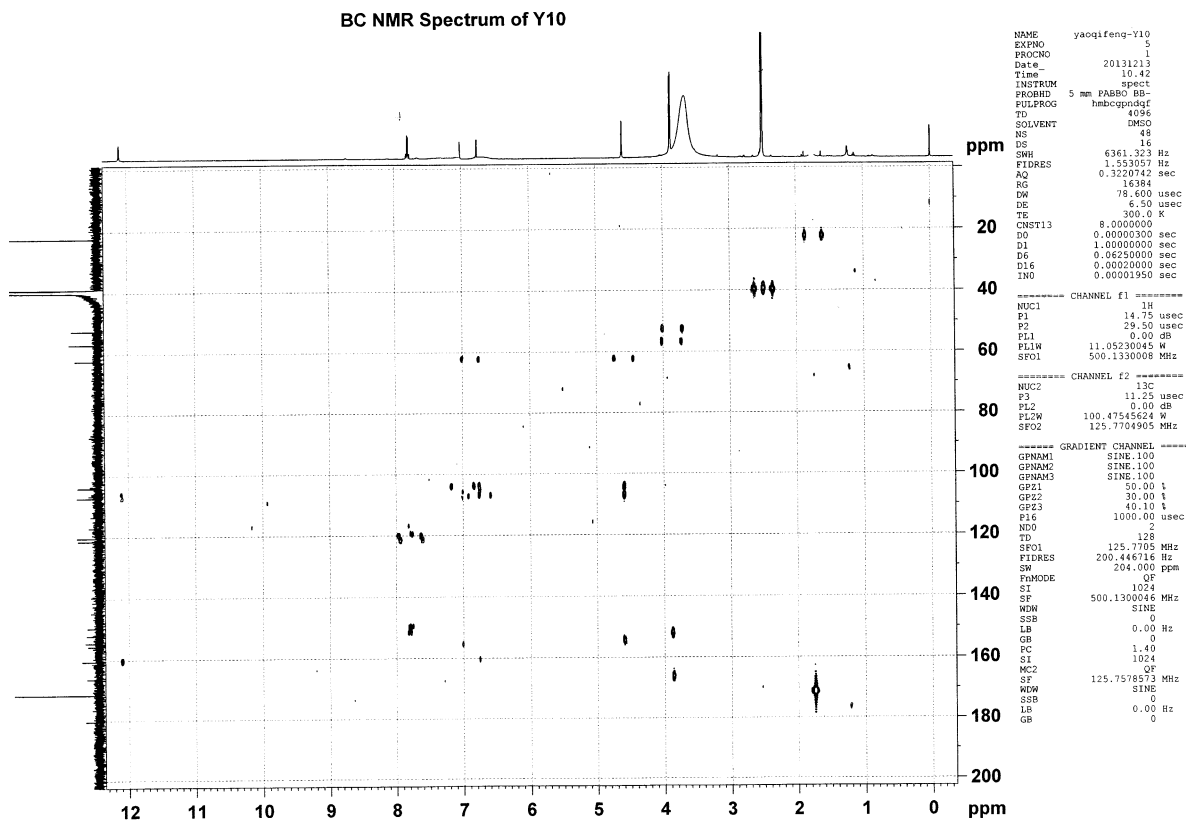

Figure S4. HRESIMS spectrum of 1.

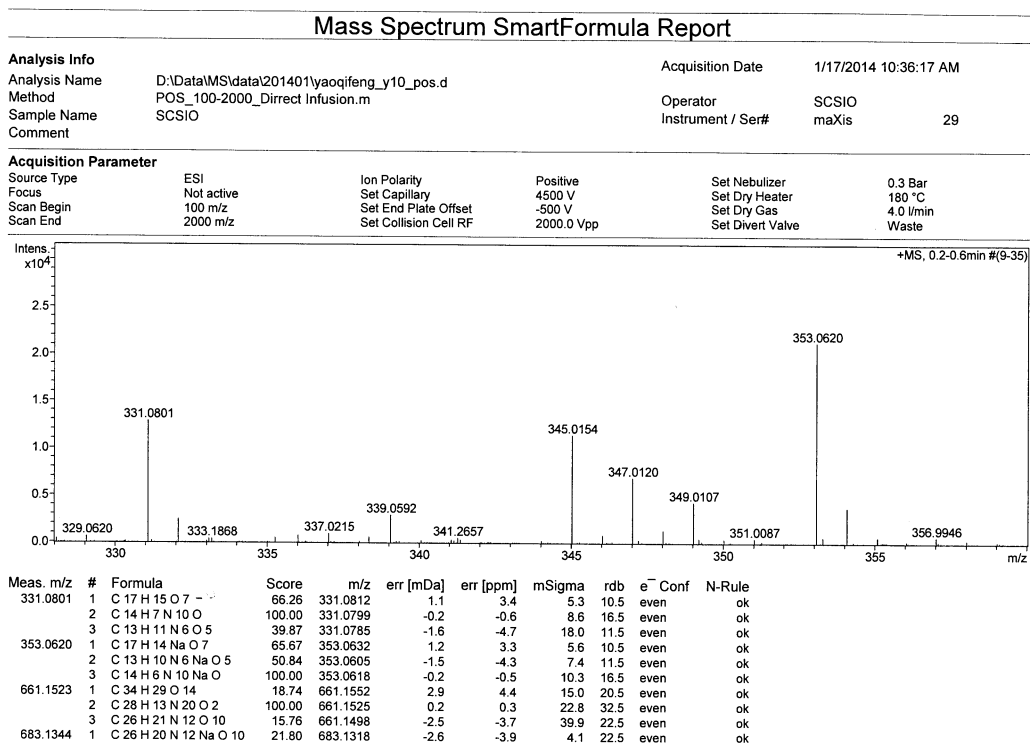

Figure S5. IR spectrum of 1.

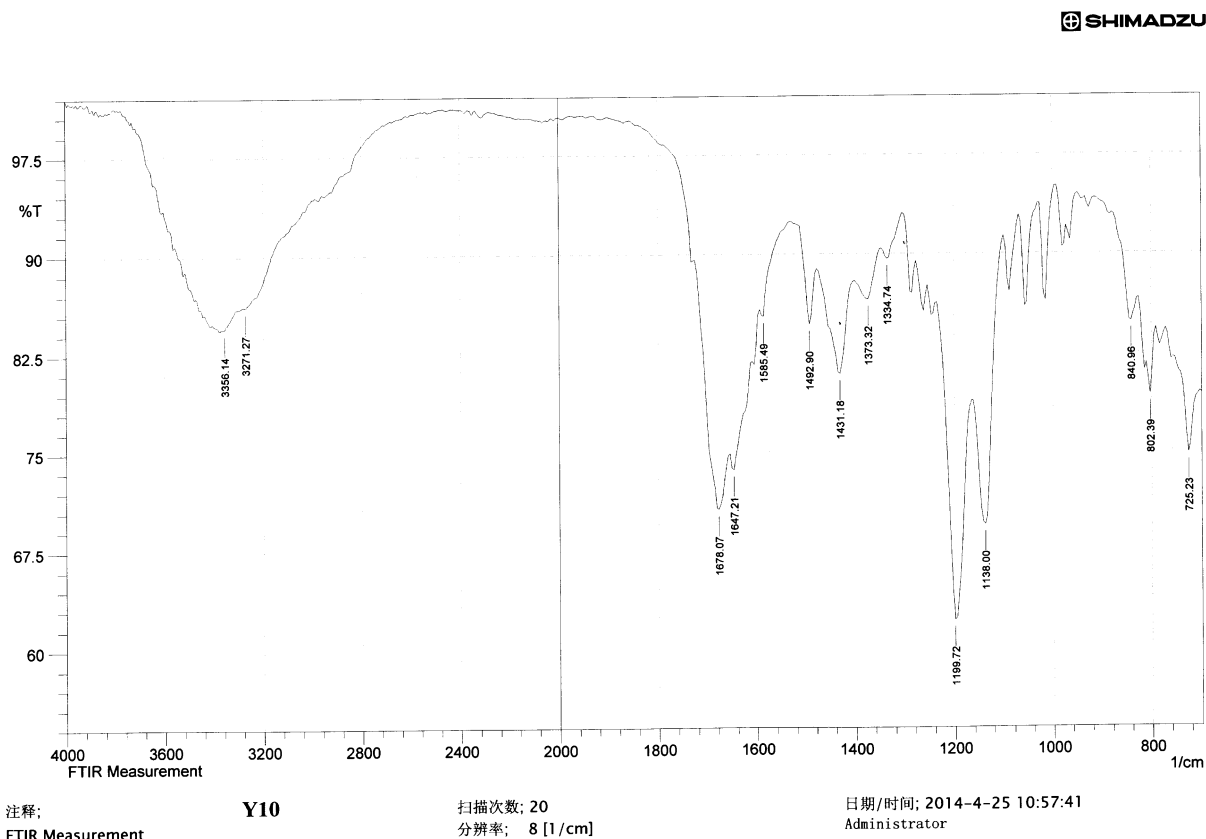

Figure S6. <sup>1</sup>H NMR spectrum of 2.

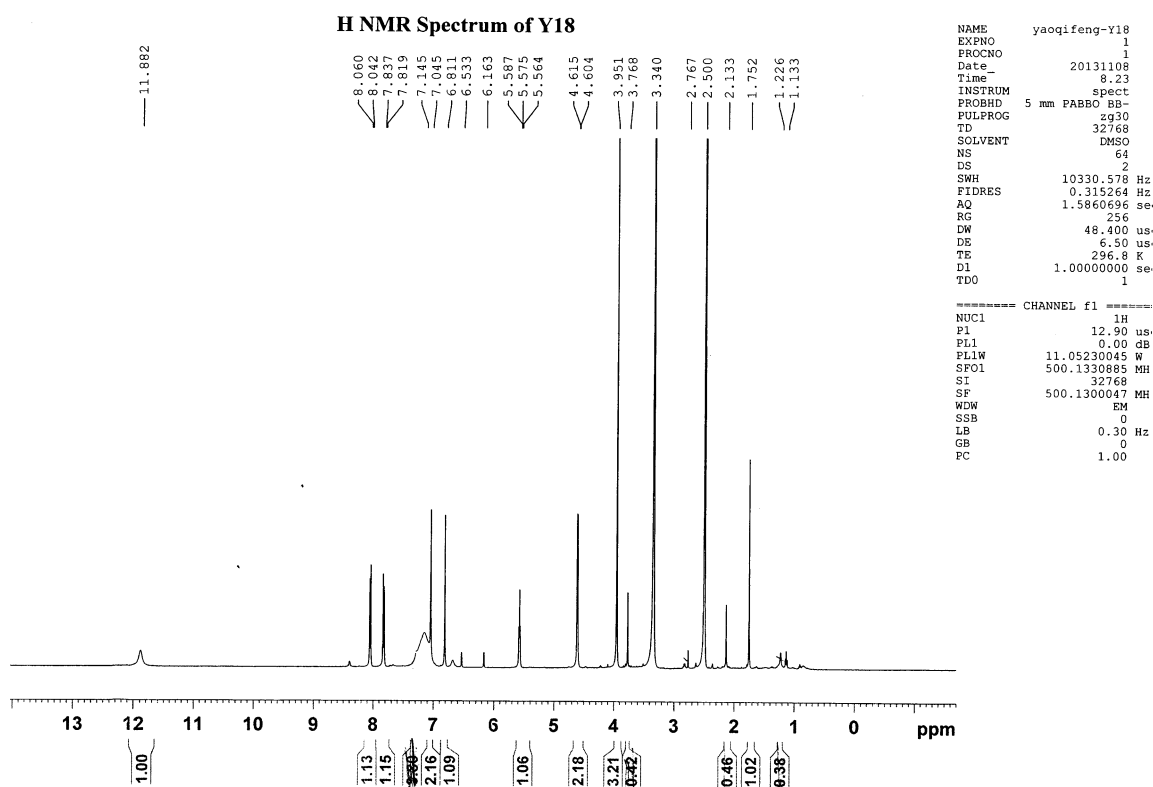

Figure S7. <sup>13</sup>C NMR spectrum of 2.

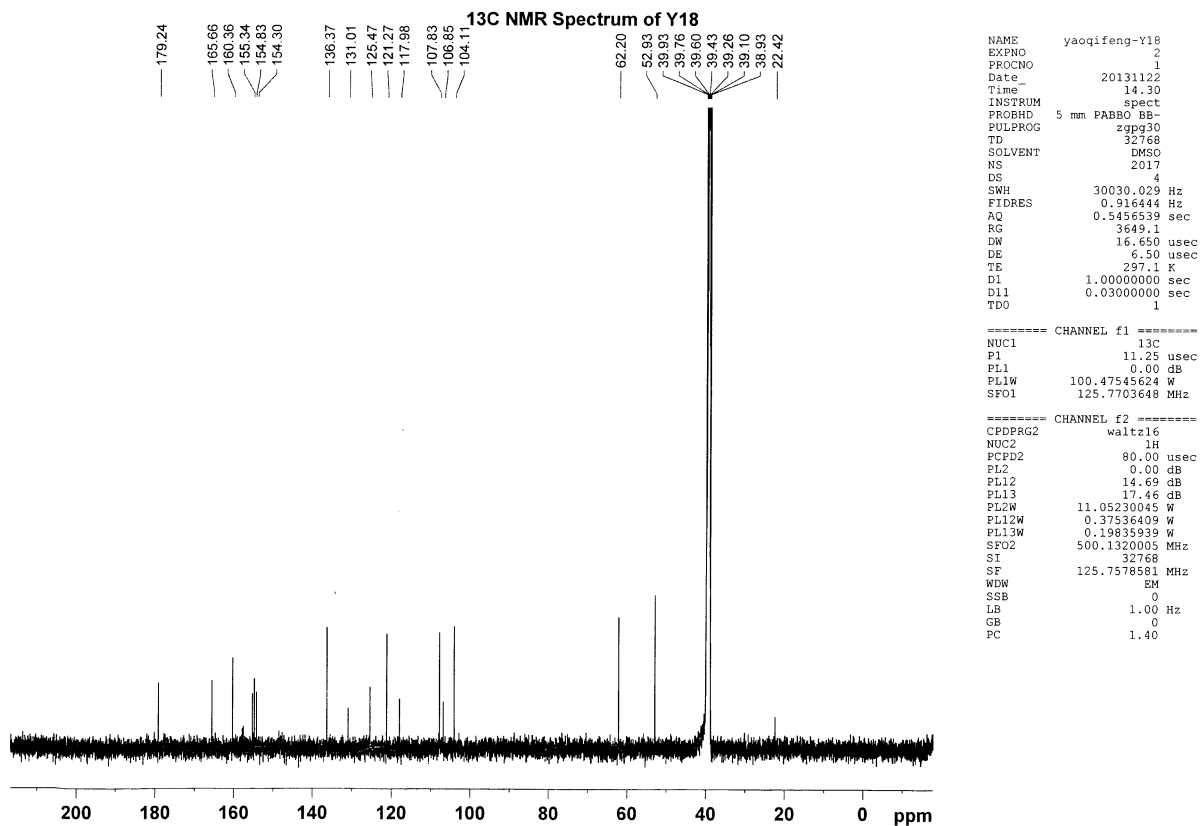

Figure S8. HMBC spectrum of 2.

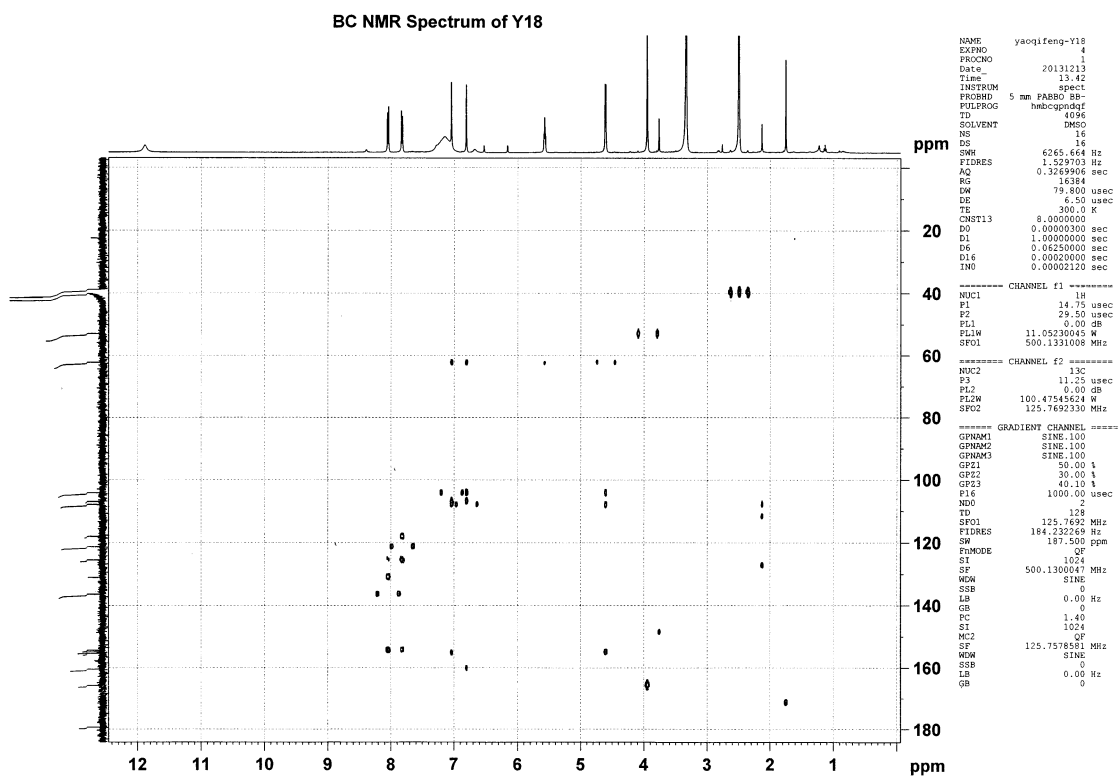



Figure S11. <sup>1</sup>H NMR spectrum of 3.

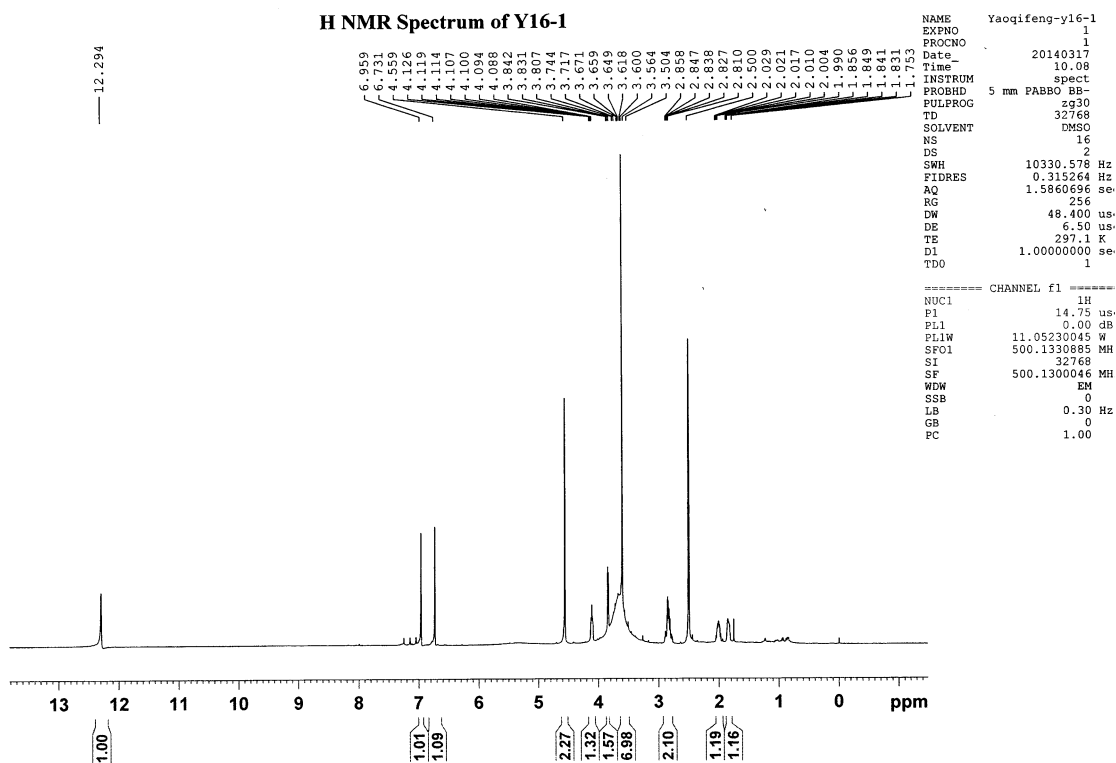

Figure S12. <sup>13</sup>C NMR spectrum of 3.

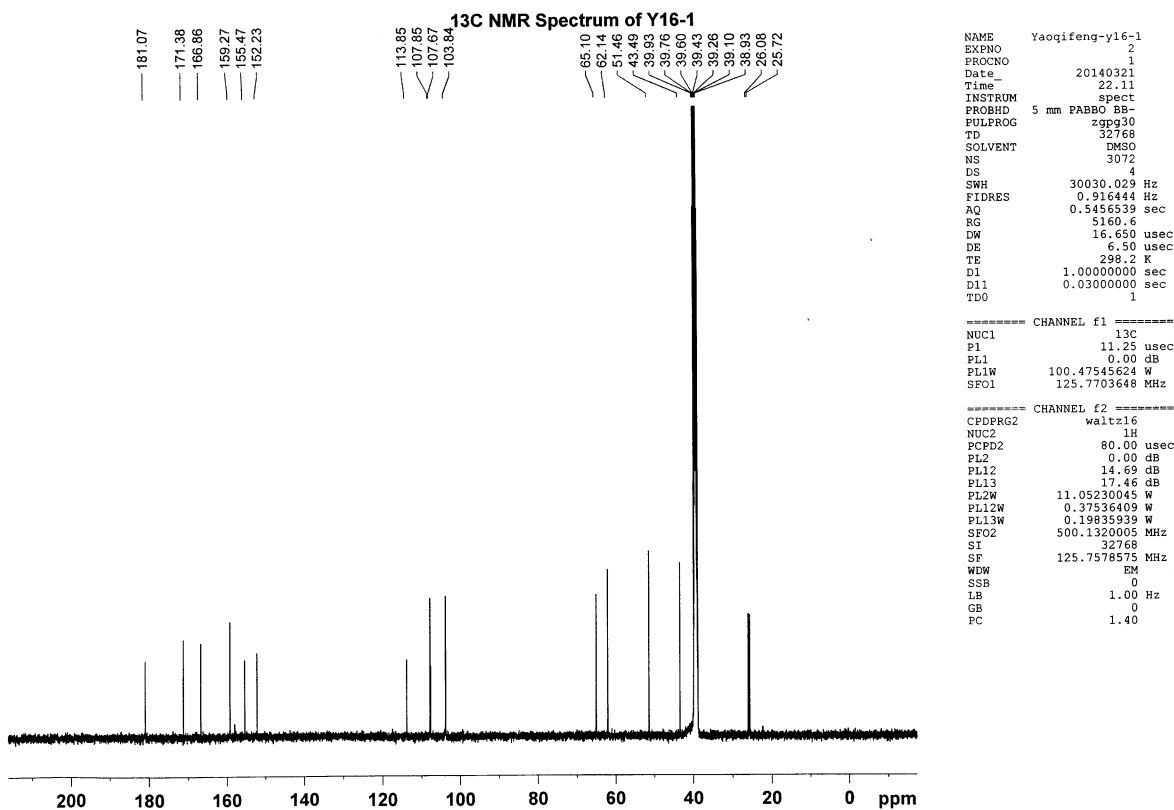



Figure S13. HSQC spectrum of 3.

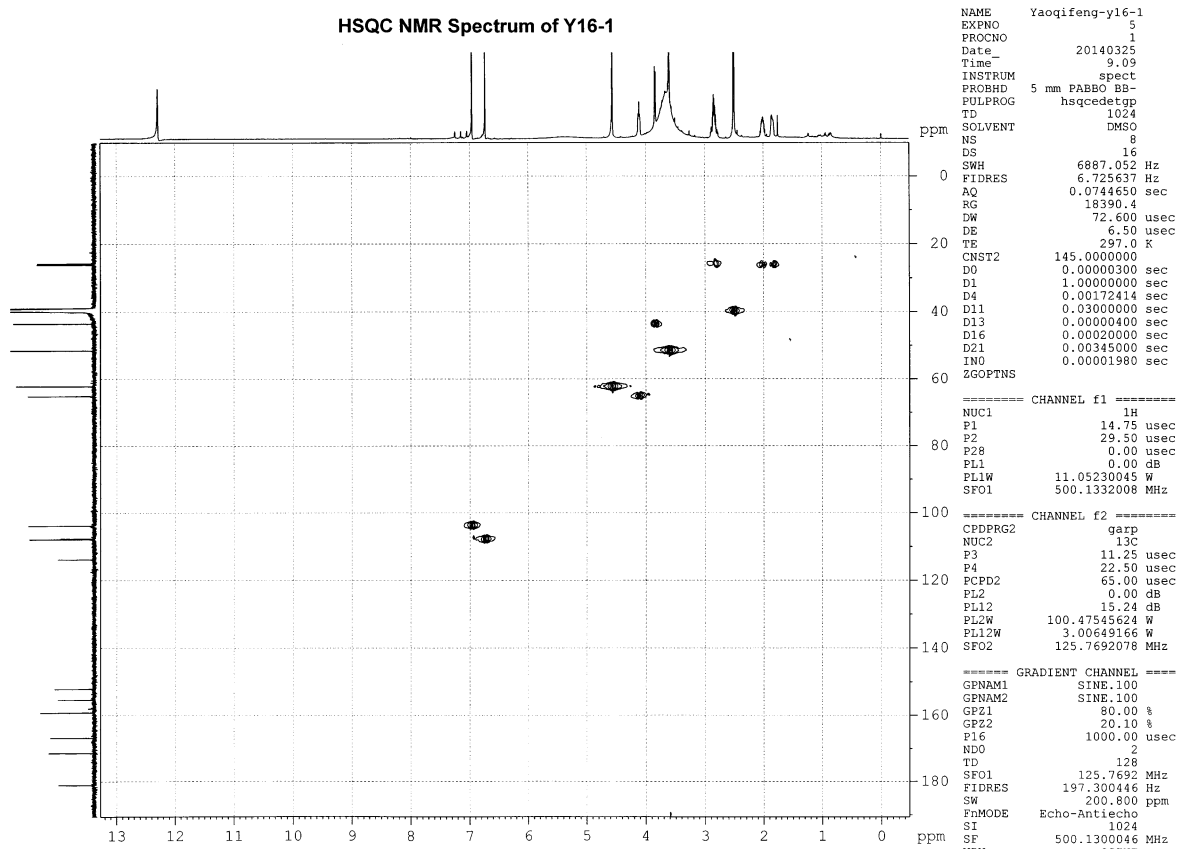

Figure S14. HMBC spectrum of 3.

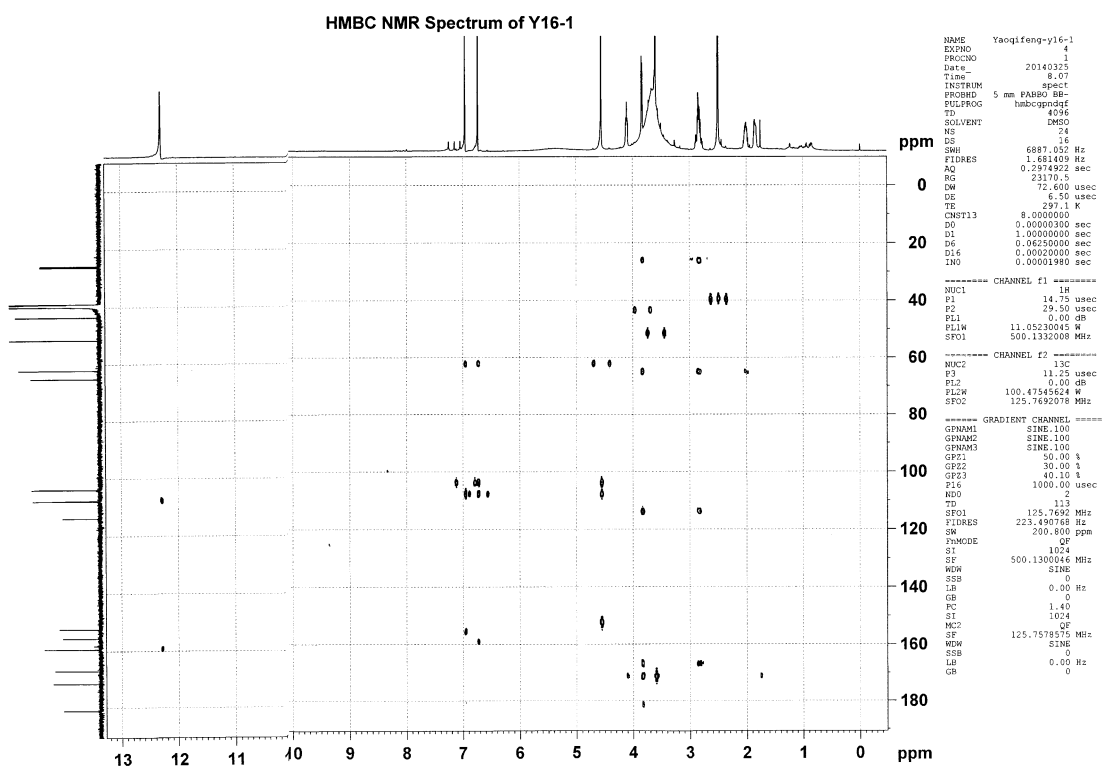

Figure S15. NOESY spectrum of 3.

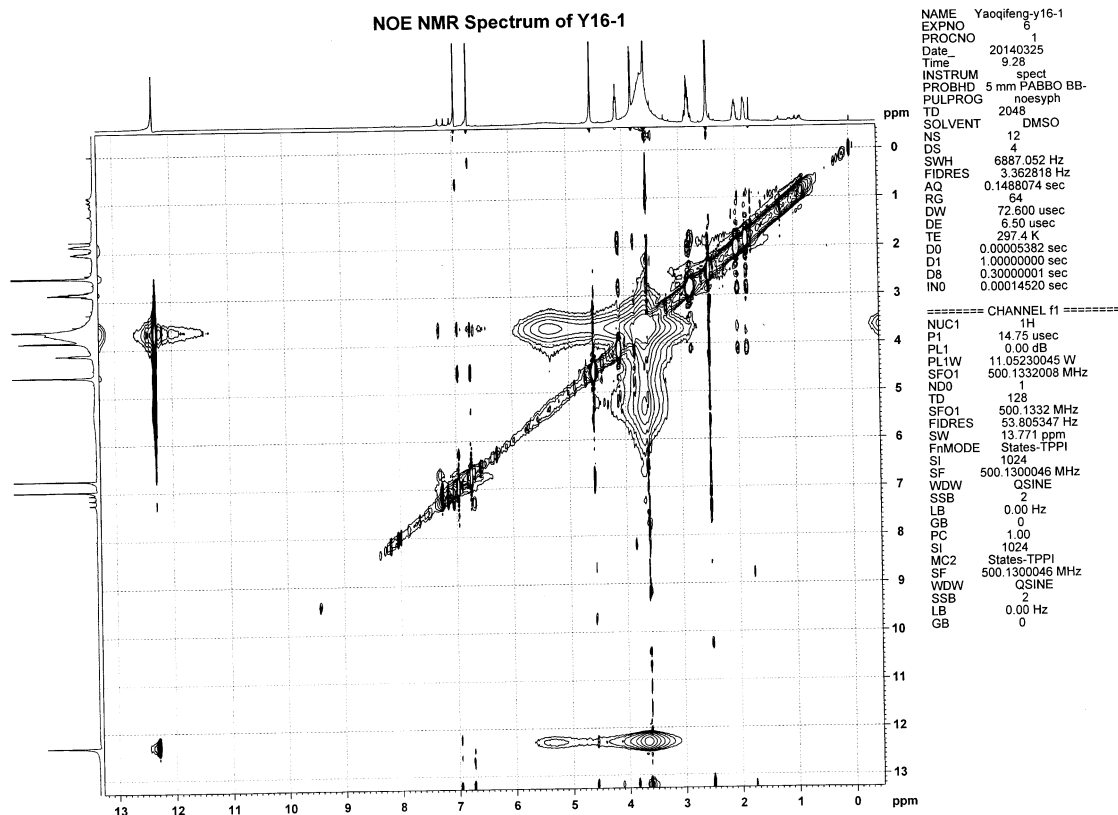

Figure S16. HRESIMS spectrum of 3.

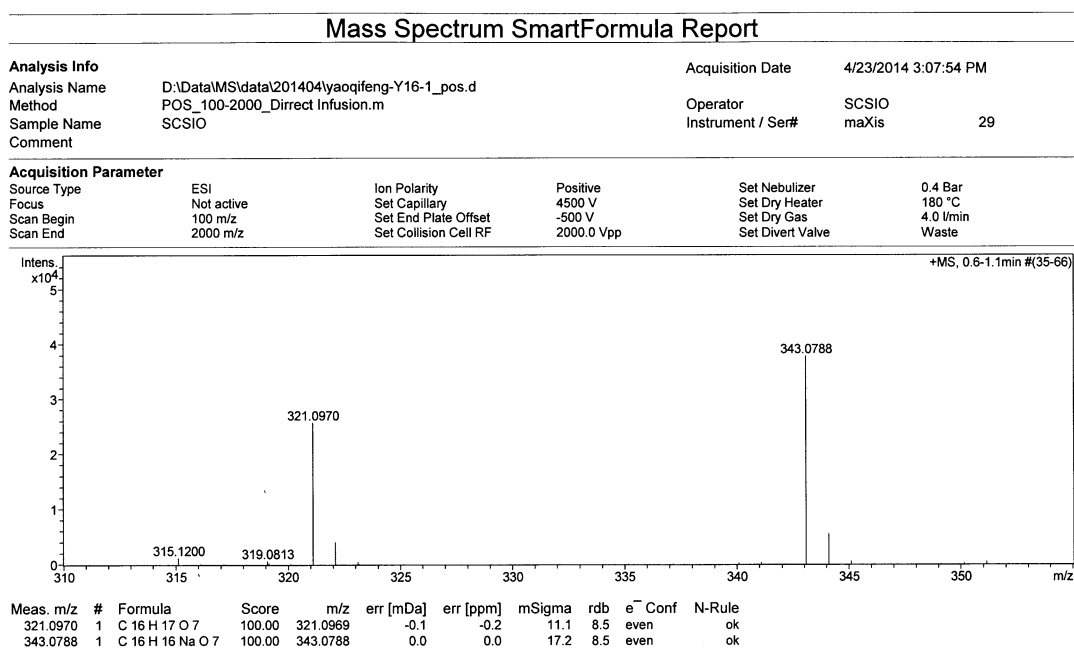

Figure S17. IR spectrum of 3.

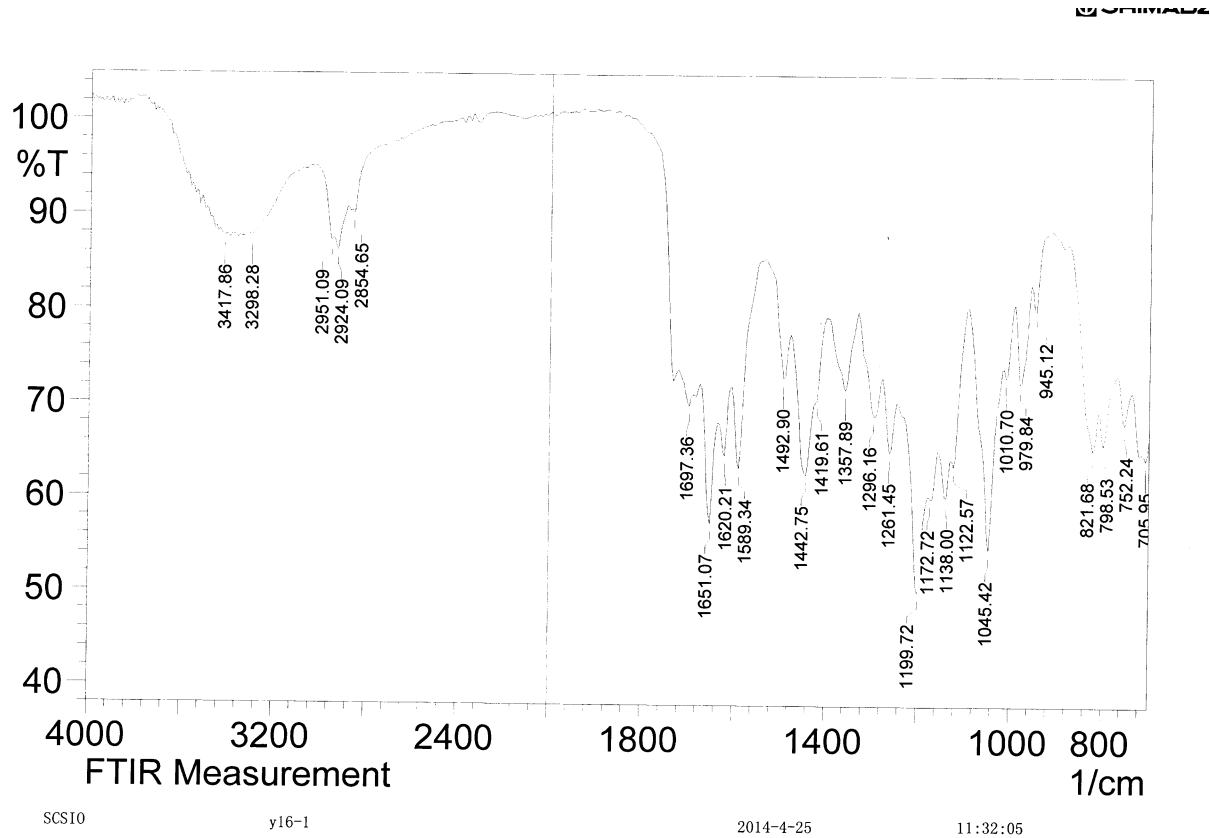

Figure S18. <sup>1</sup>H NMR spectrum of 4.

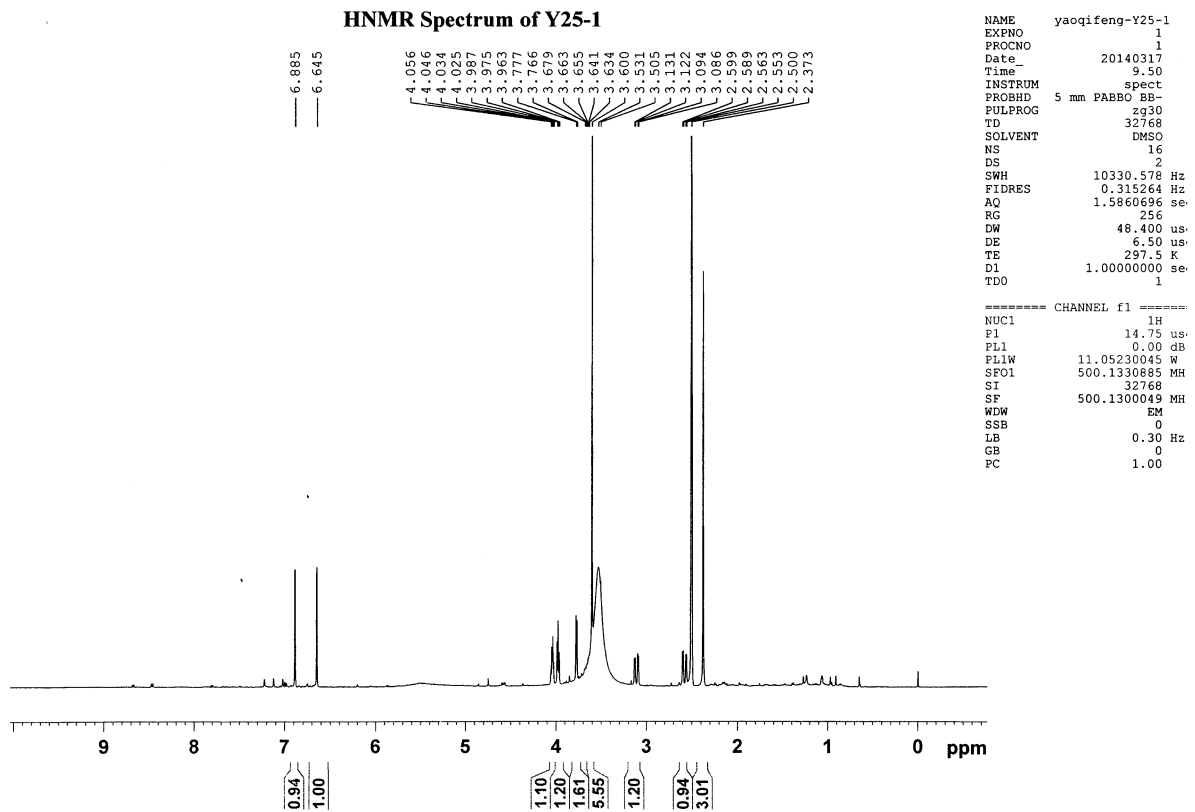

Figure S19. <sup>13</sup>C NMR spectrum of 4.

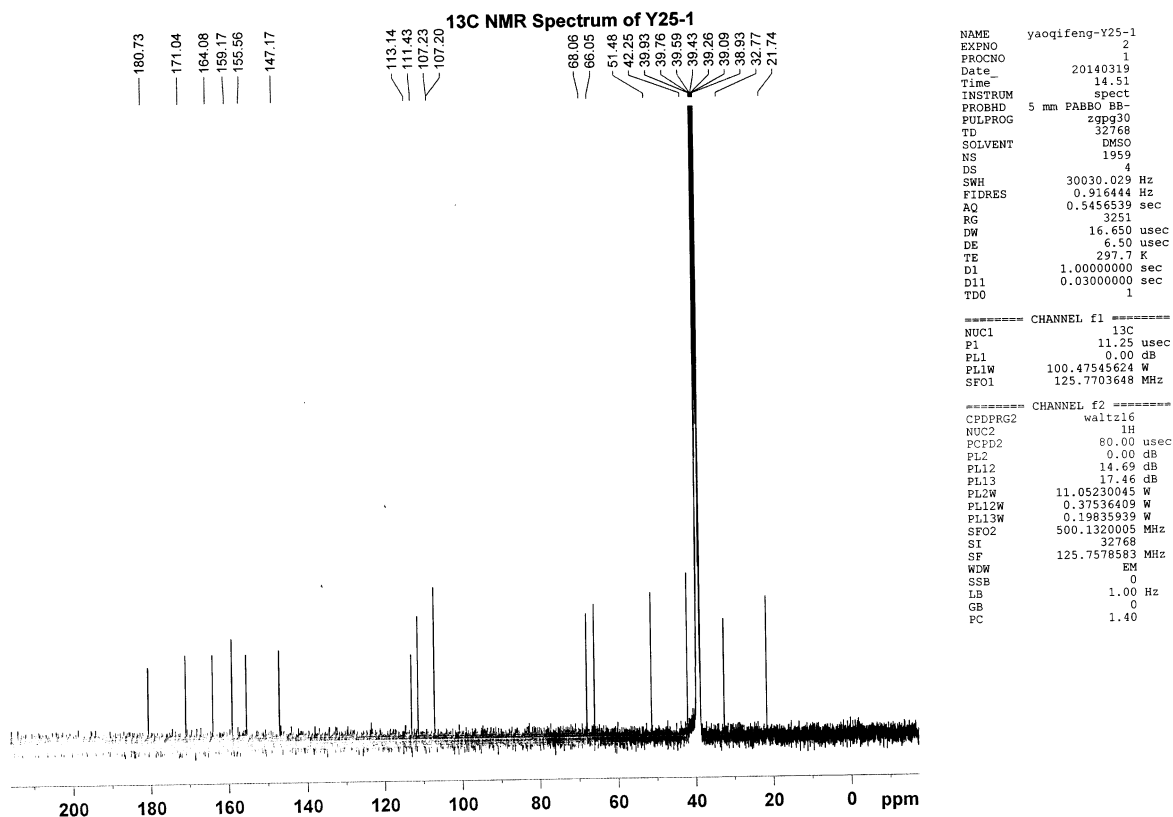

Figure S20. HSQC spectrum of 4.

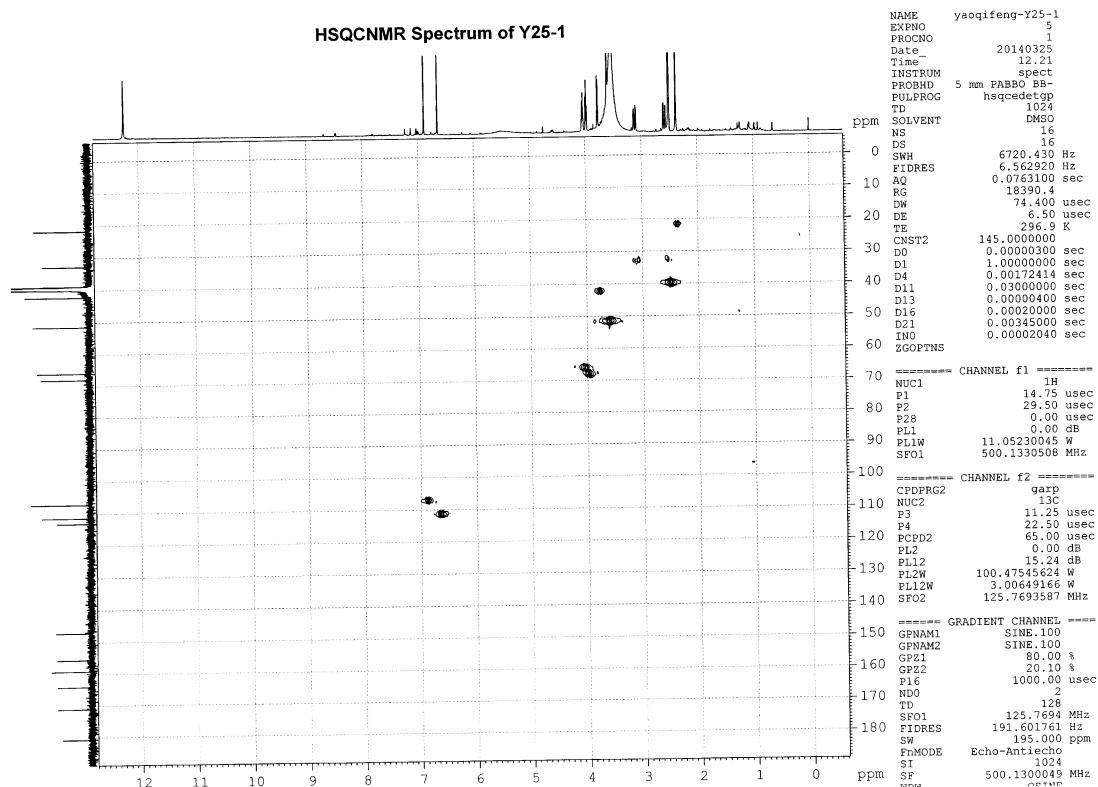

Figure S21. HMBC spectrum of 4.

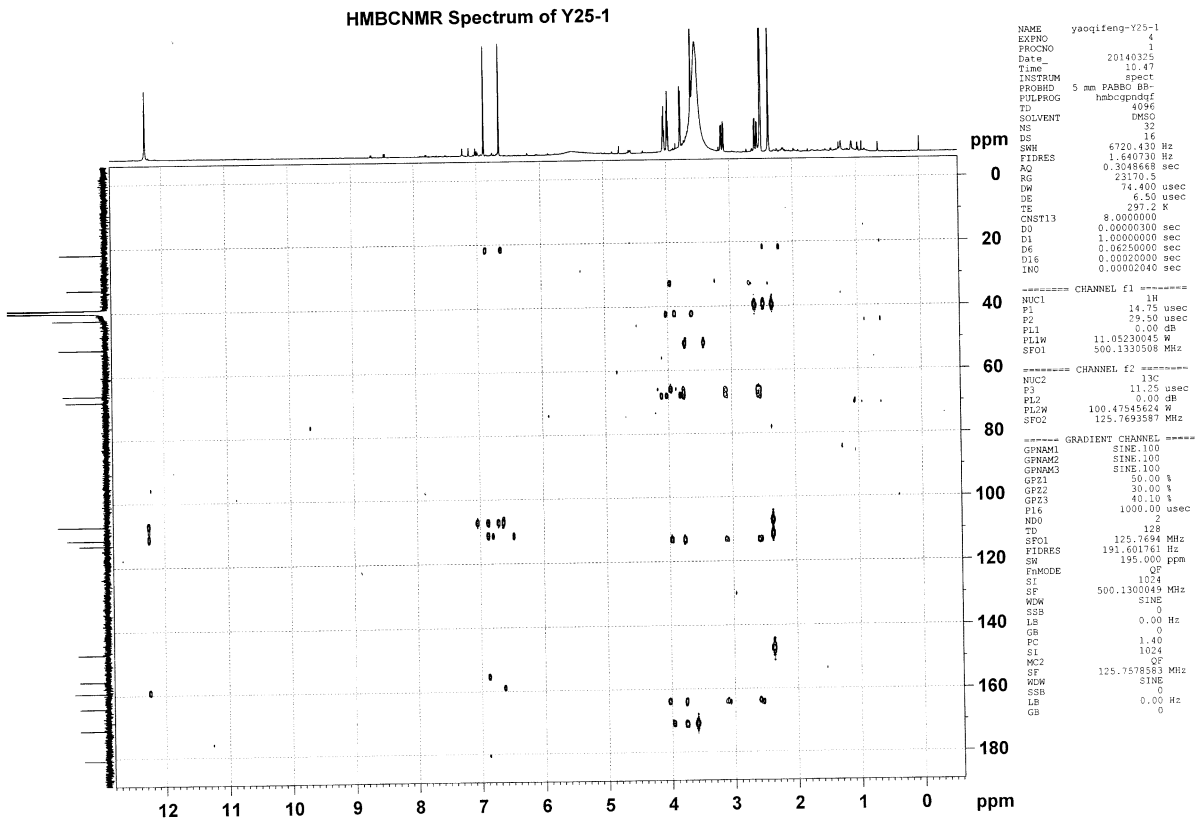

Figure S22. NOESY spectrum of 4.

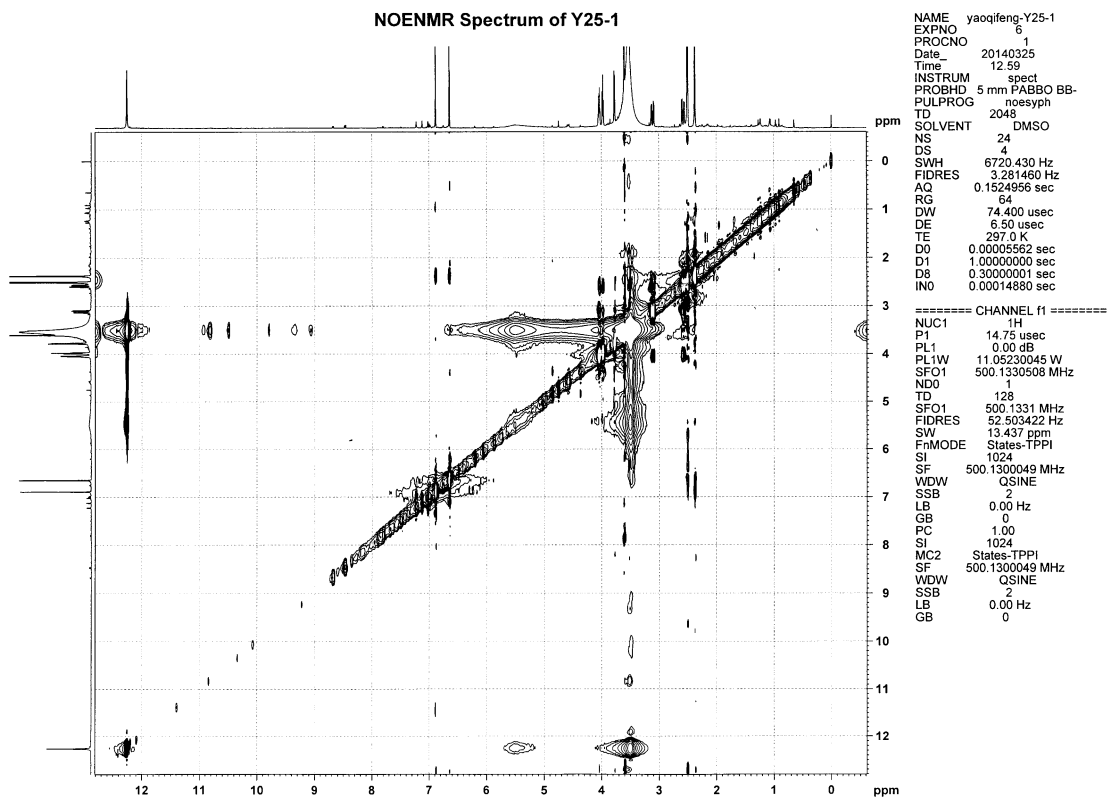

Figure S23. HRESIMS spectrum of 4.

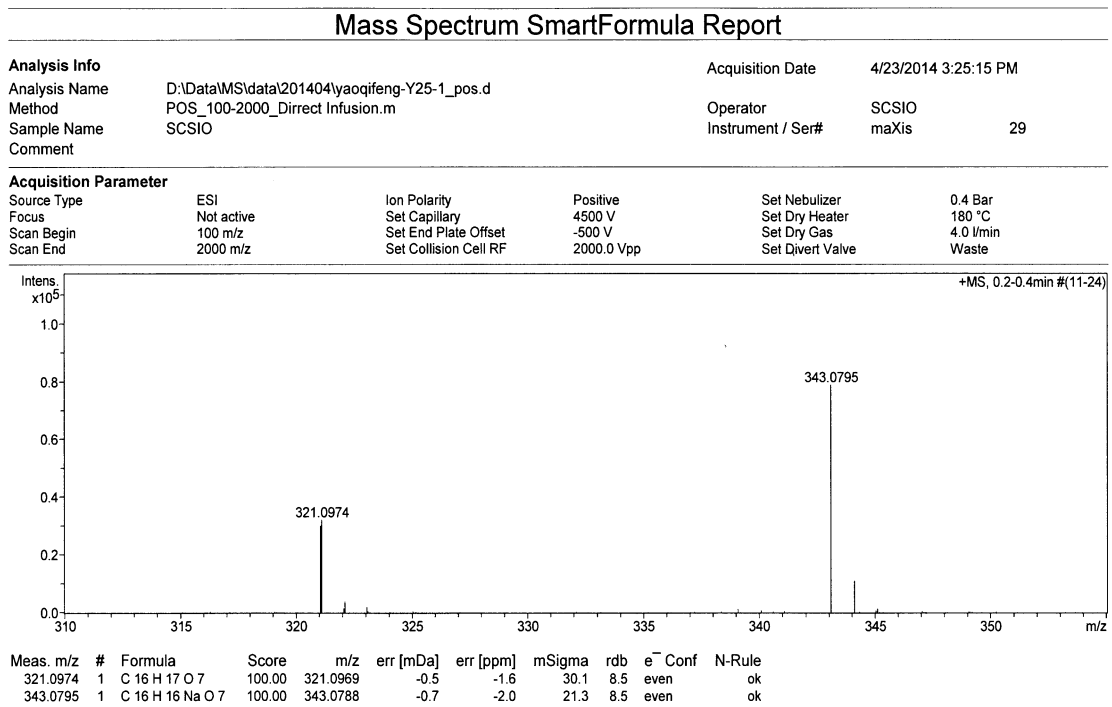

Figure S24. IR spectrum of 4.

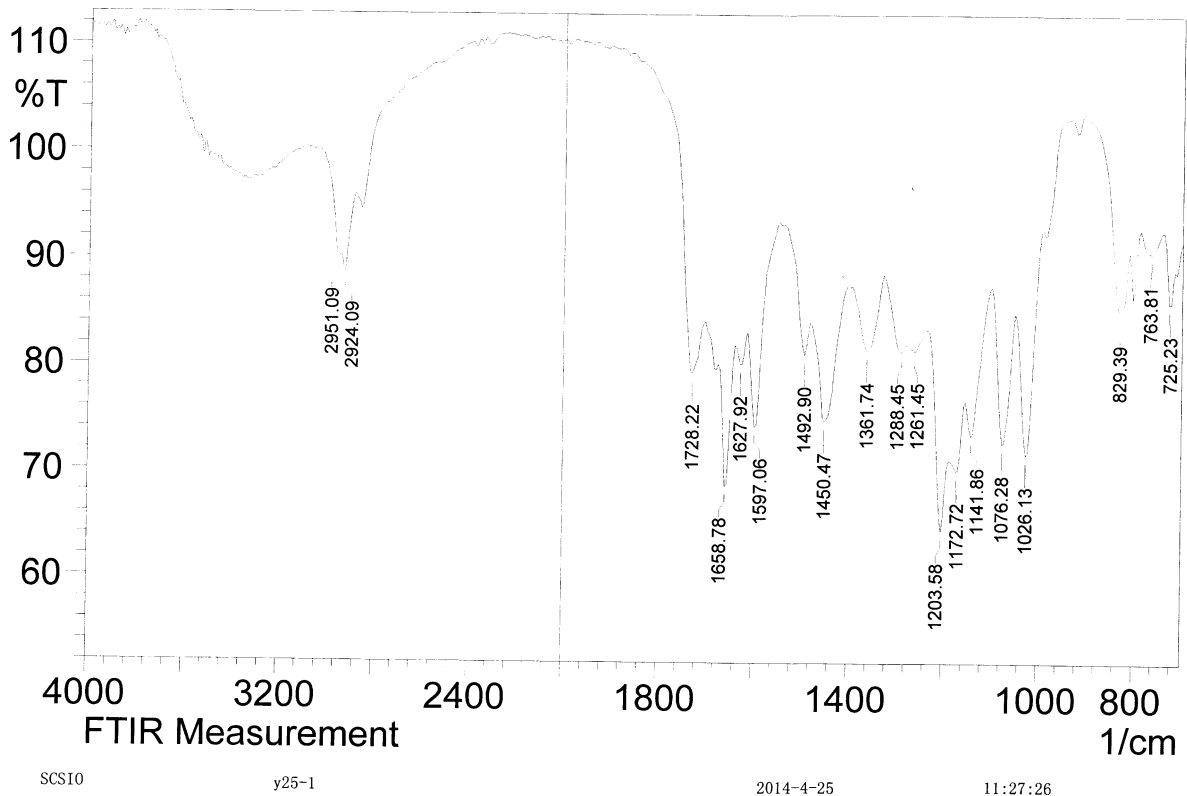

Figure S25. <sup>1</sup>H NMR spectrum of 5.

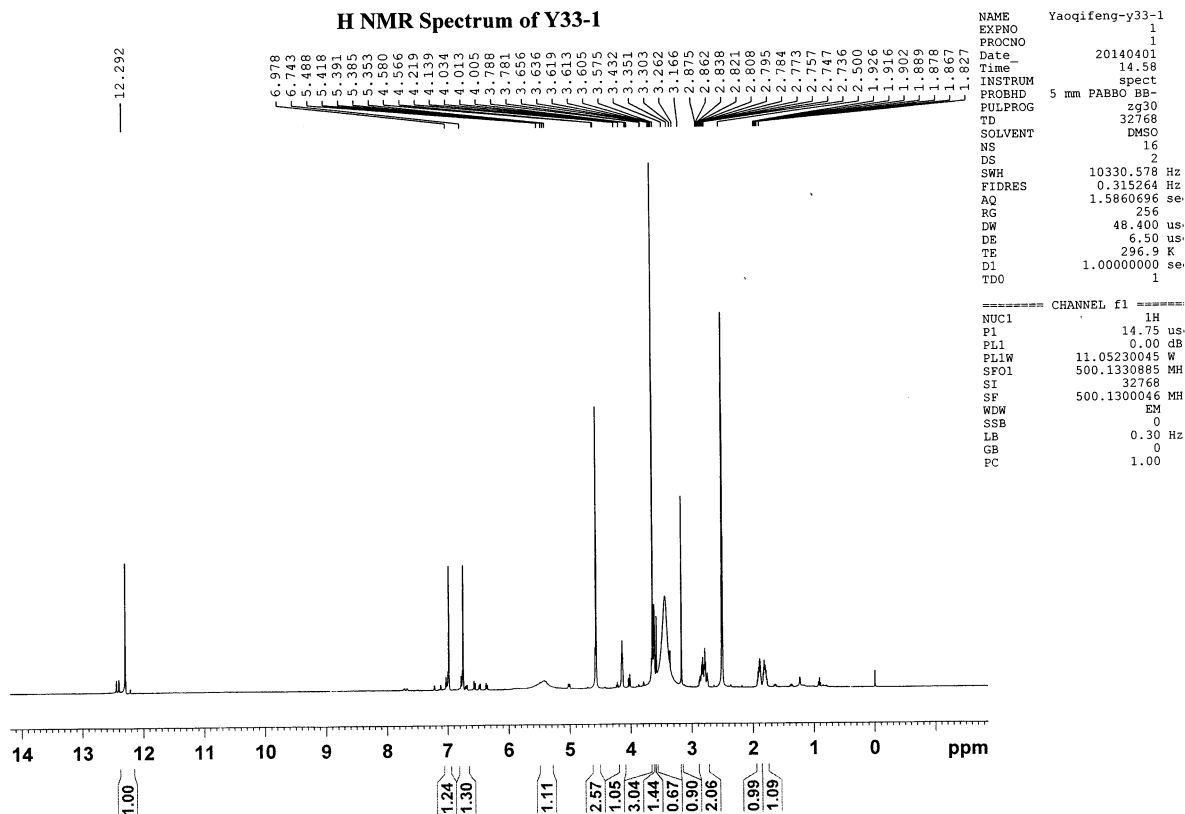

Figure S26. <sup>13</sup>C NMR spectrum of 5.

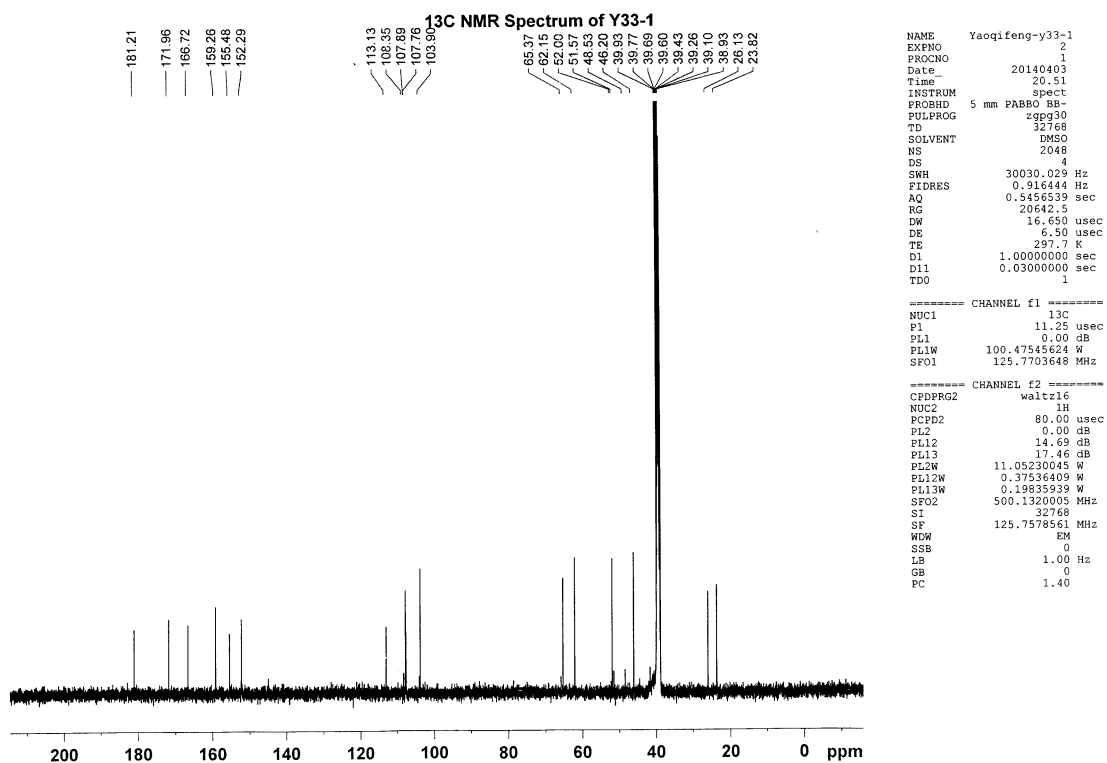

Figure S27. HMBC spectrum of 5.

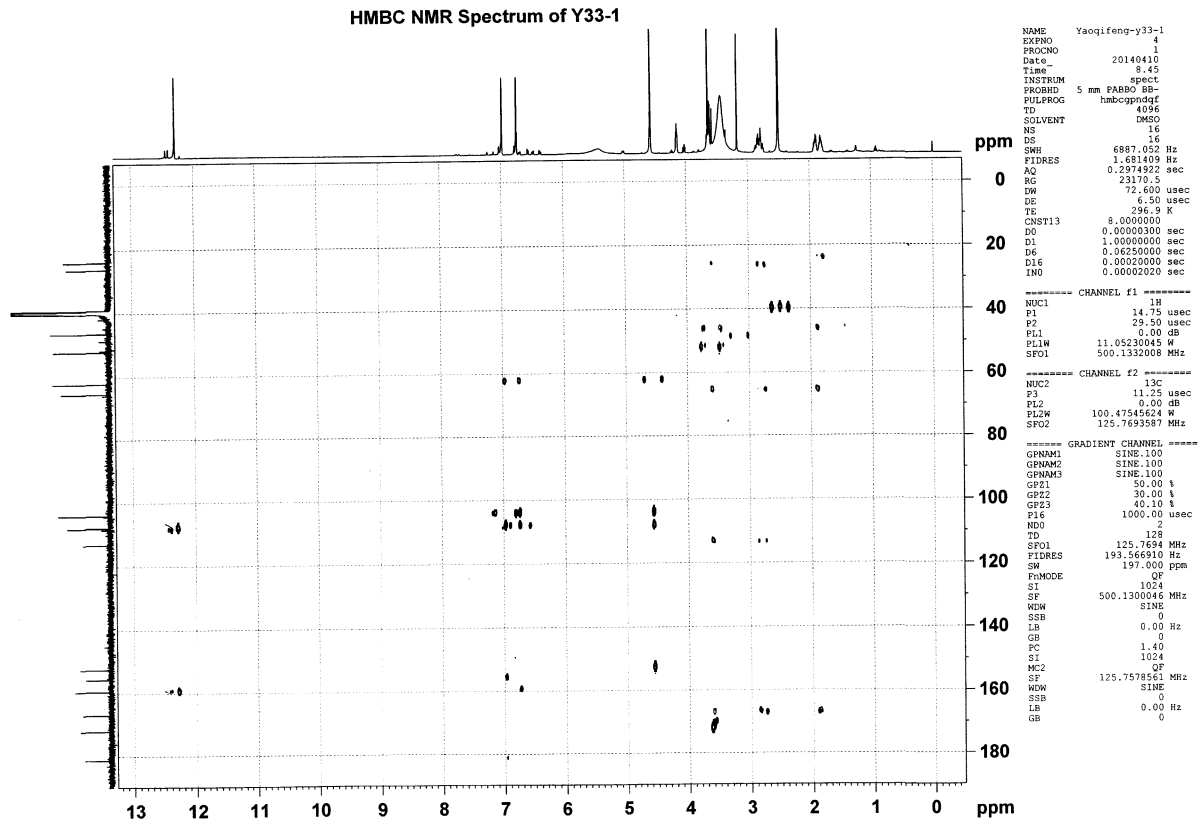

Figure S28. NOESY spectrum of 5.

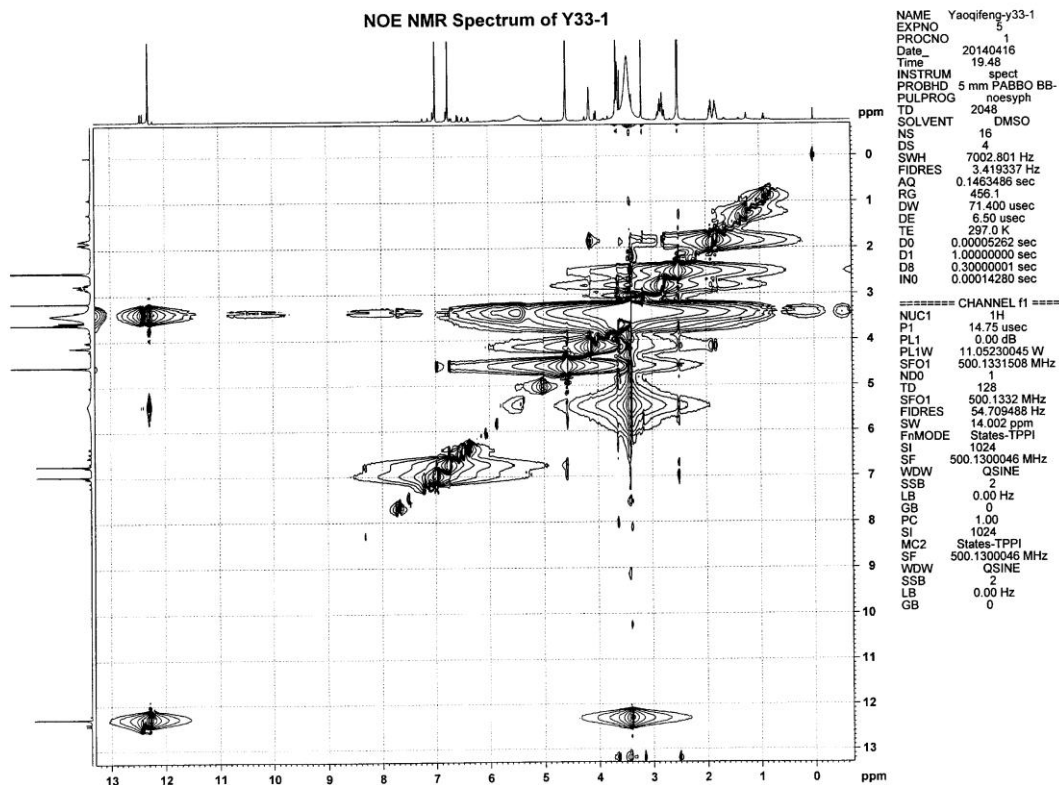



Figure S29. HRESIMS spectrum of 5.

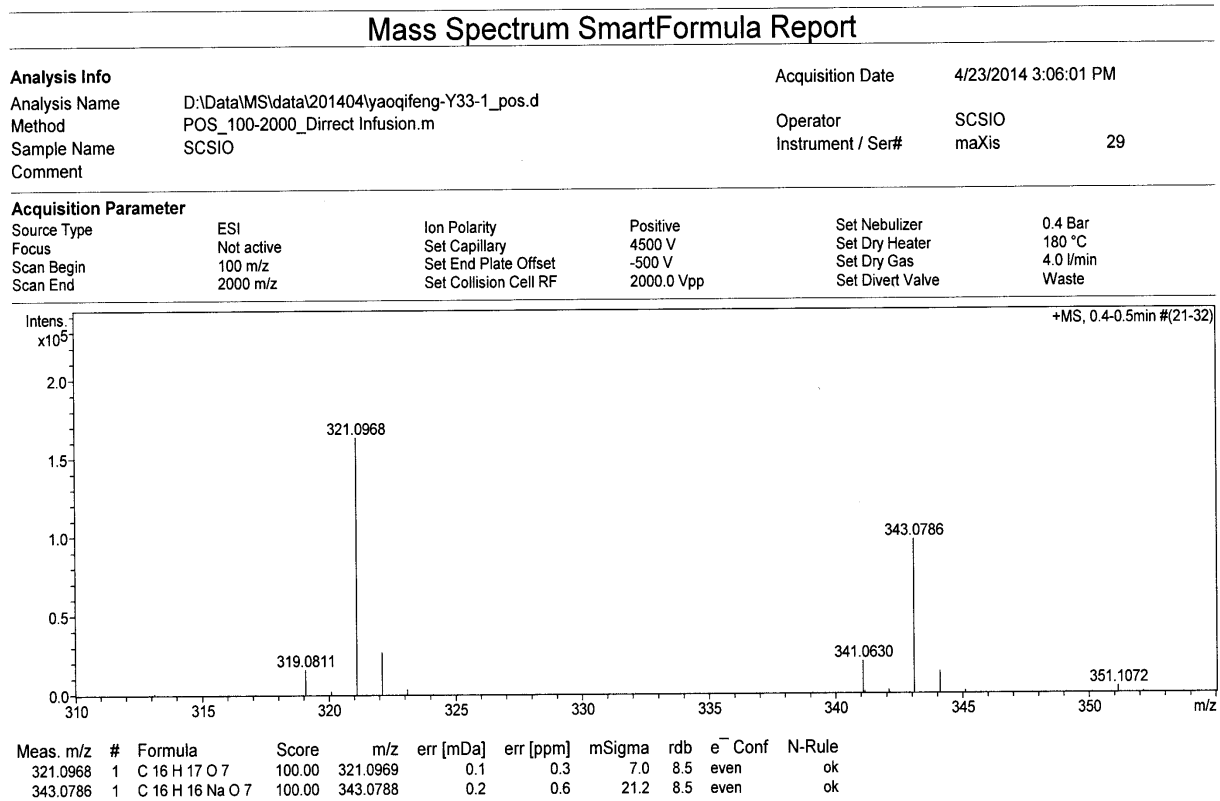

Figure S30. IR spectrum of 5.

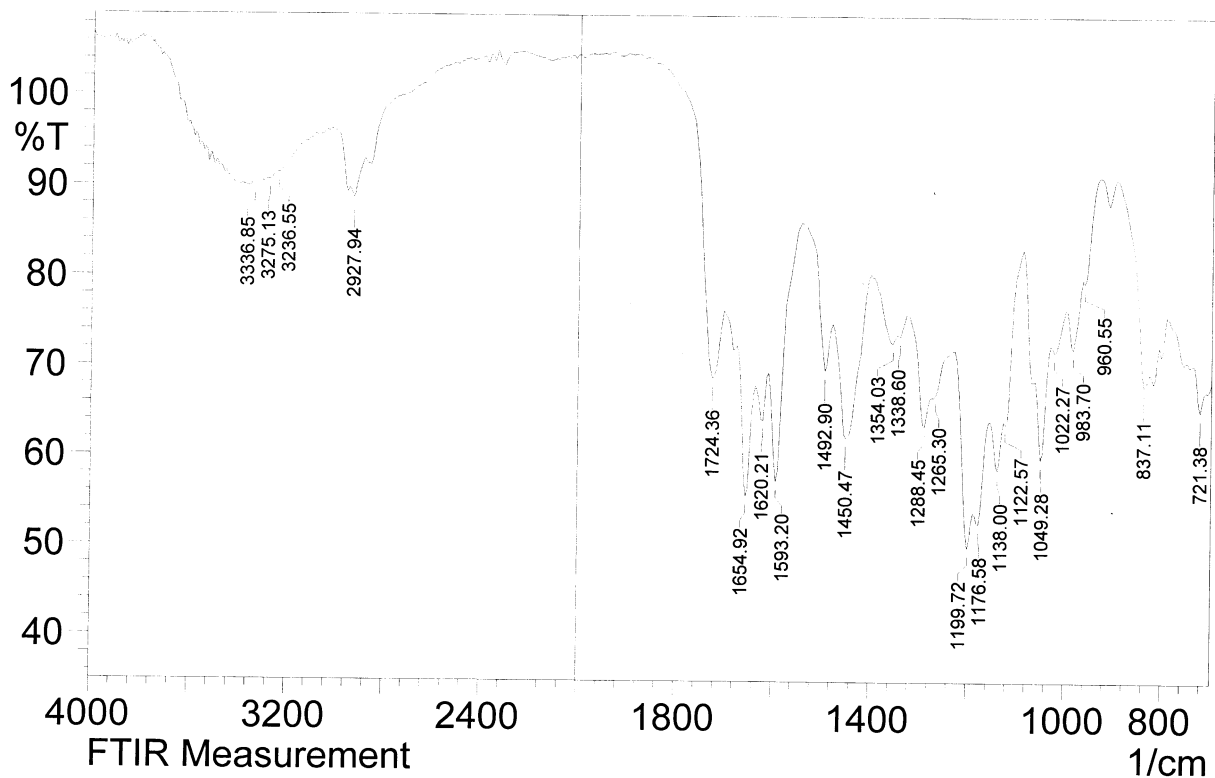

Figure S31. <sup>1</sup>H NMR spectrum of 6.

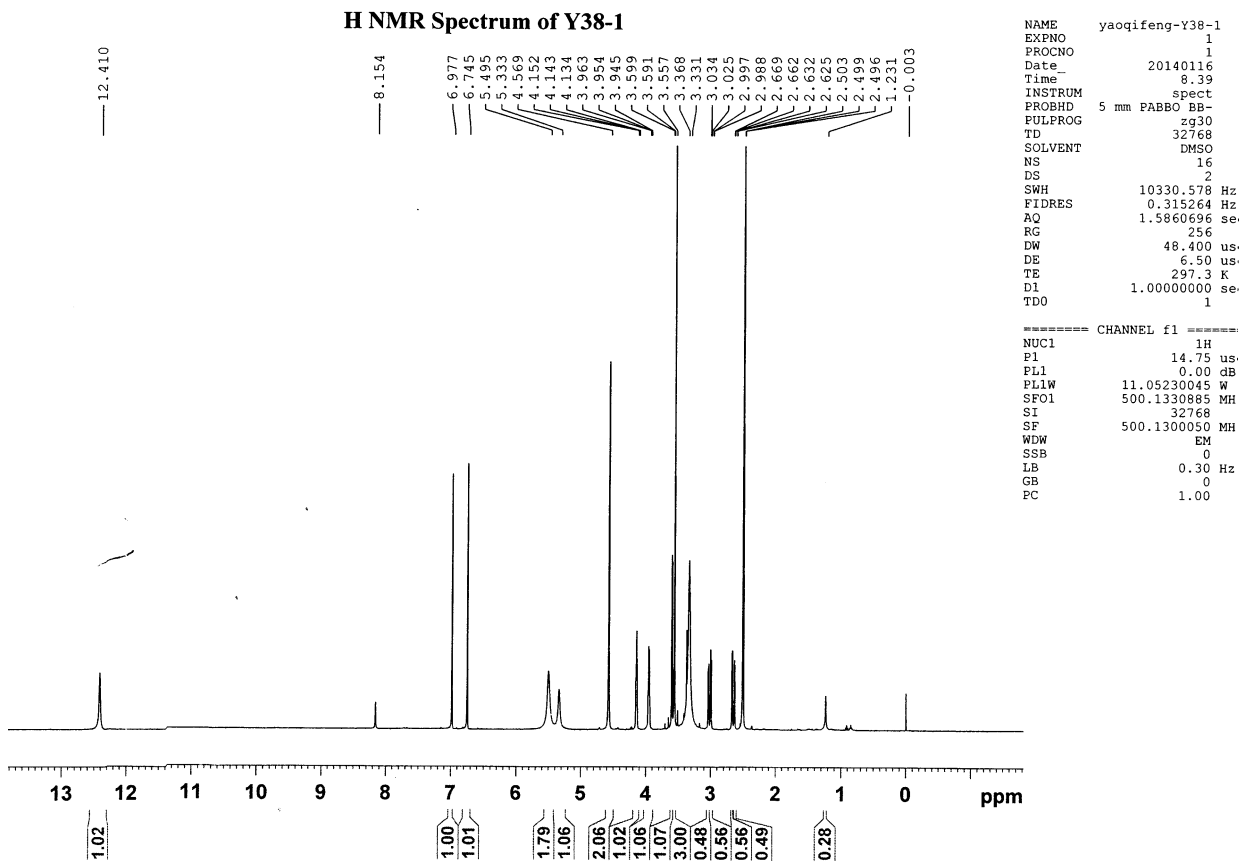

Figure S32. <sup>13</sup>C NMR spectrum of 6.

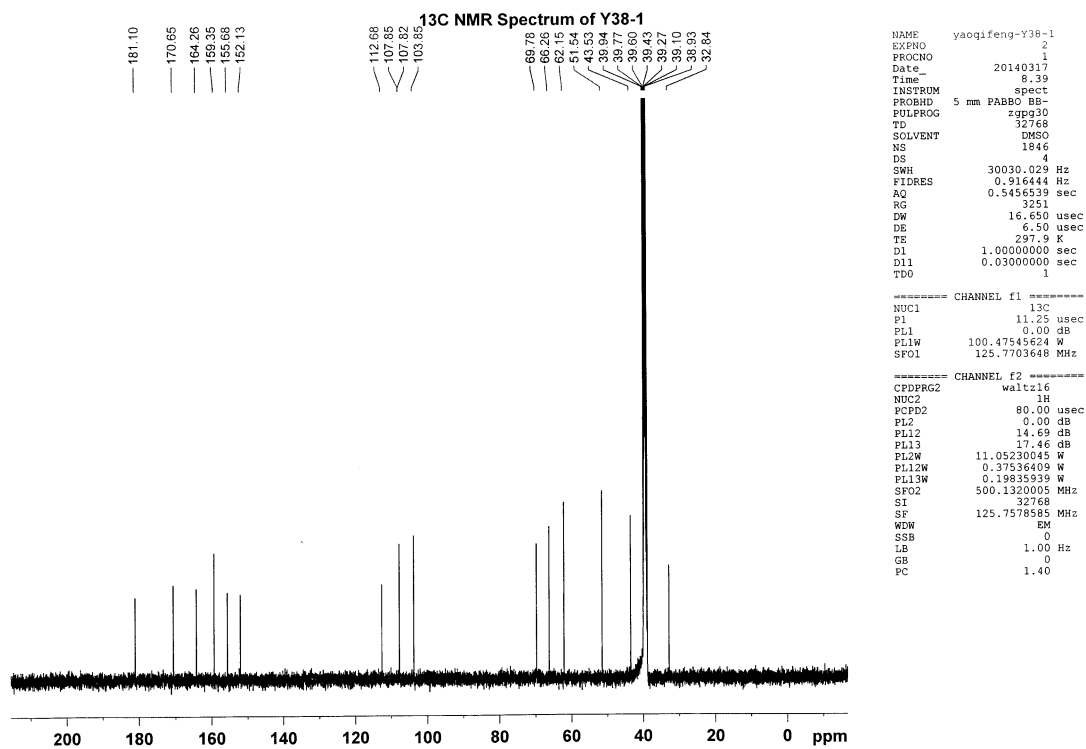

Figure S33. HSQC spectrum of 6.

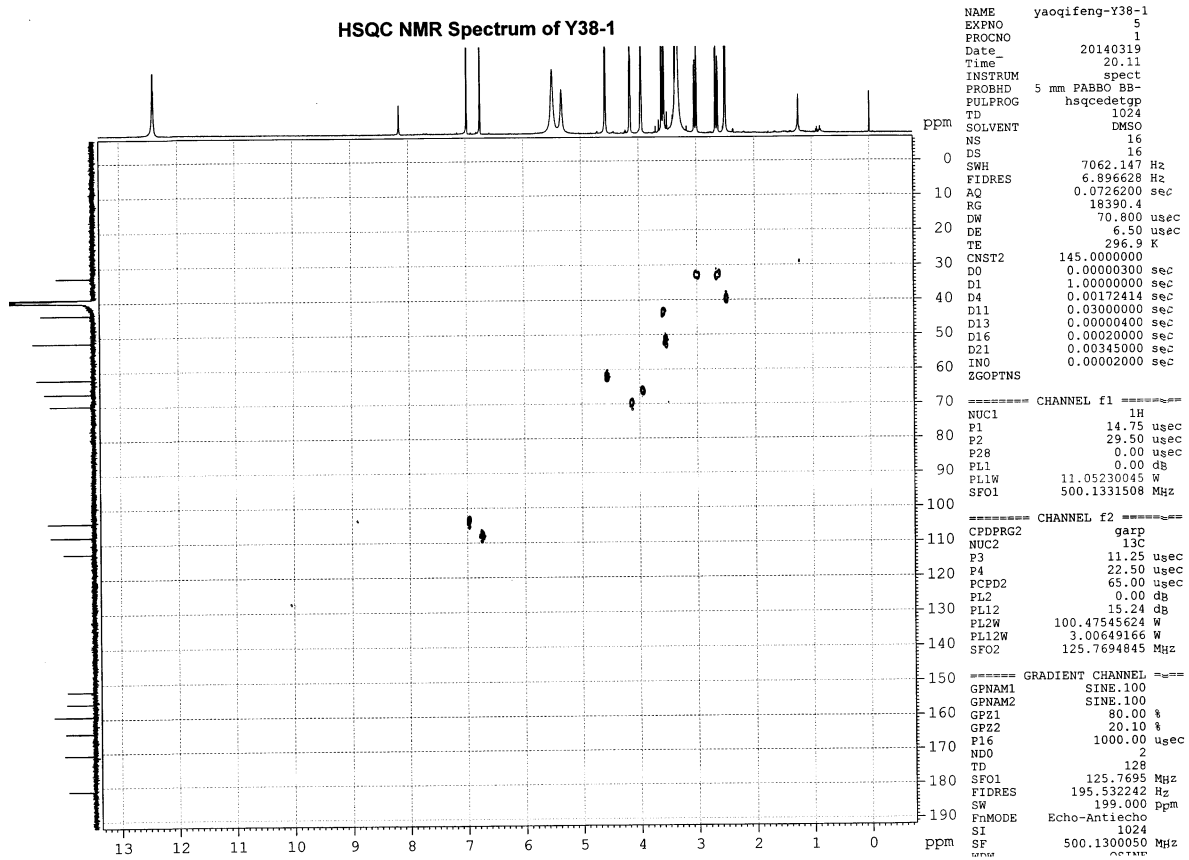

Figure S34. HMBC spectrum of 6.

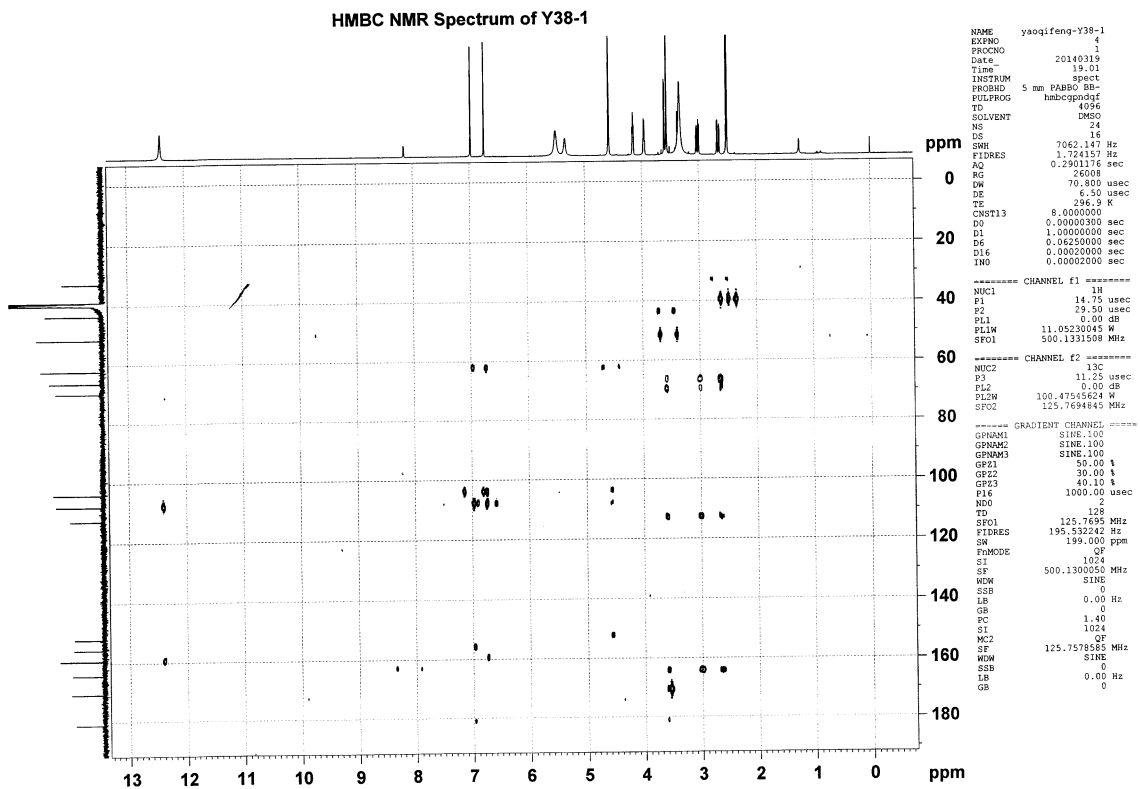

Figure S35. H-H COSY spectrum of 6.

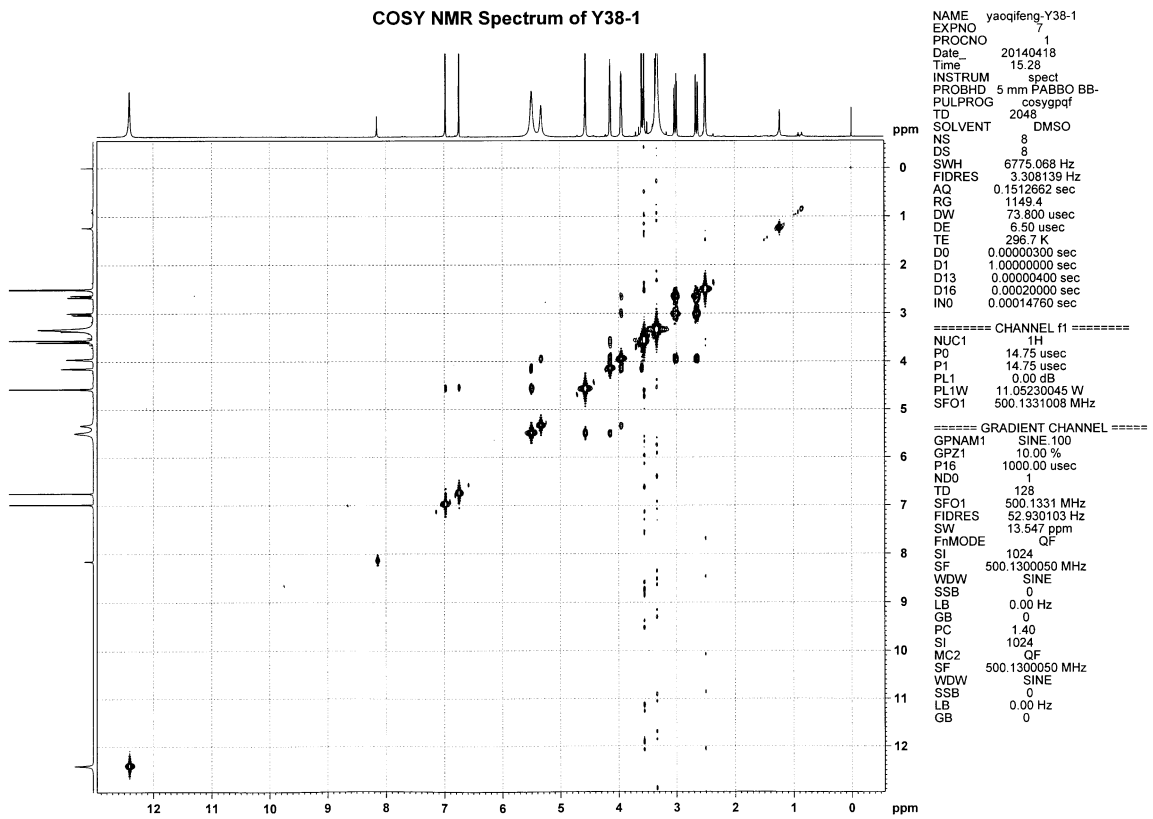

Figure S36. NOESY spectrum of 6.

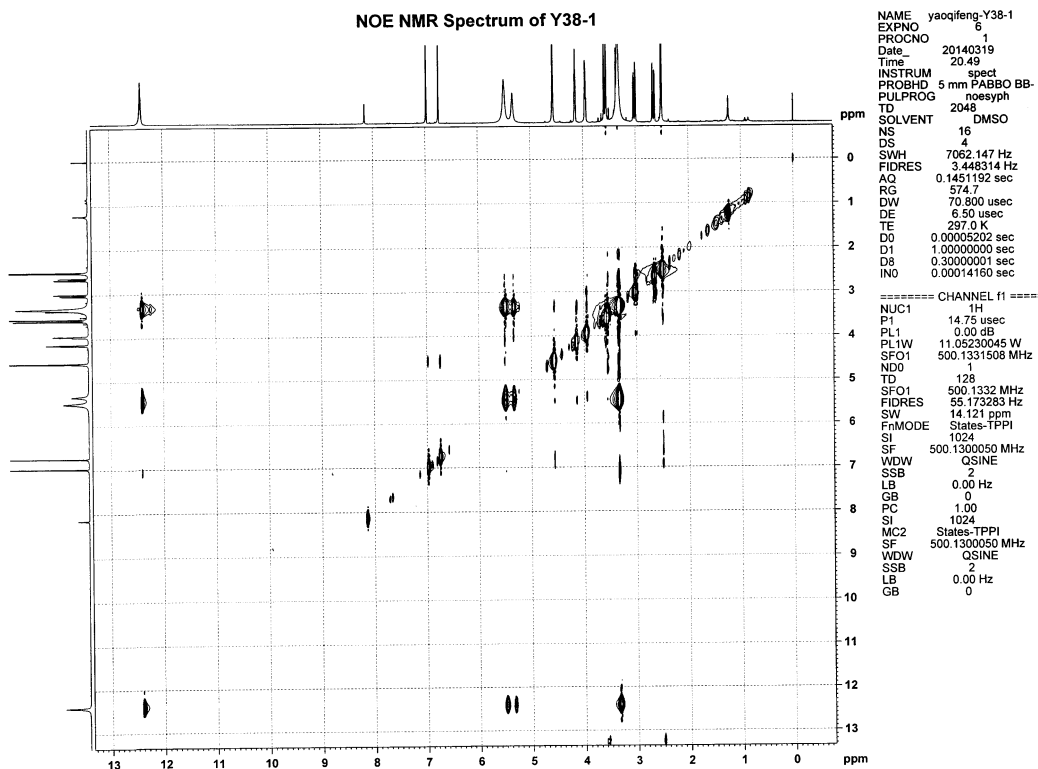

Figure S37. HRESIMS spectrum of 6.

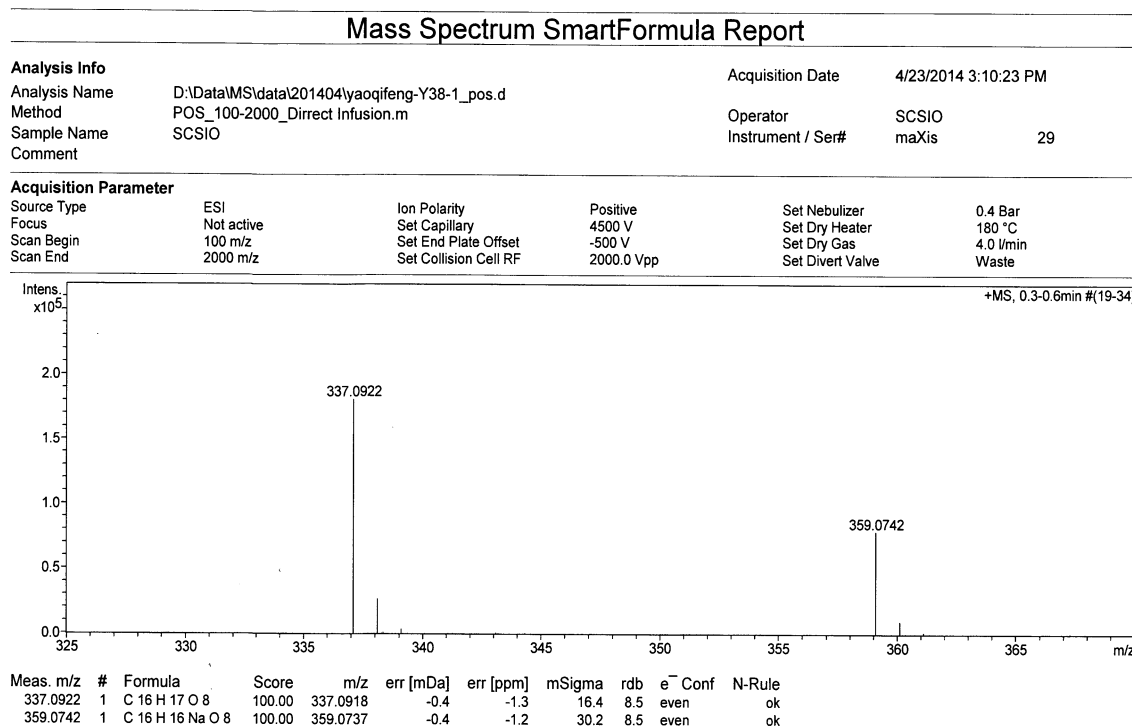

Figure S38. HRESIMS spectrum of 6.

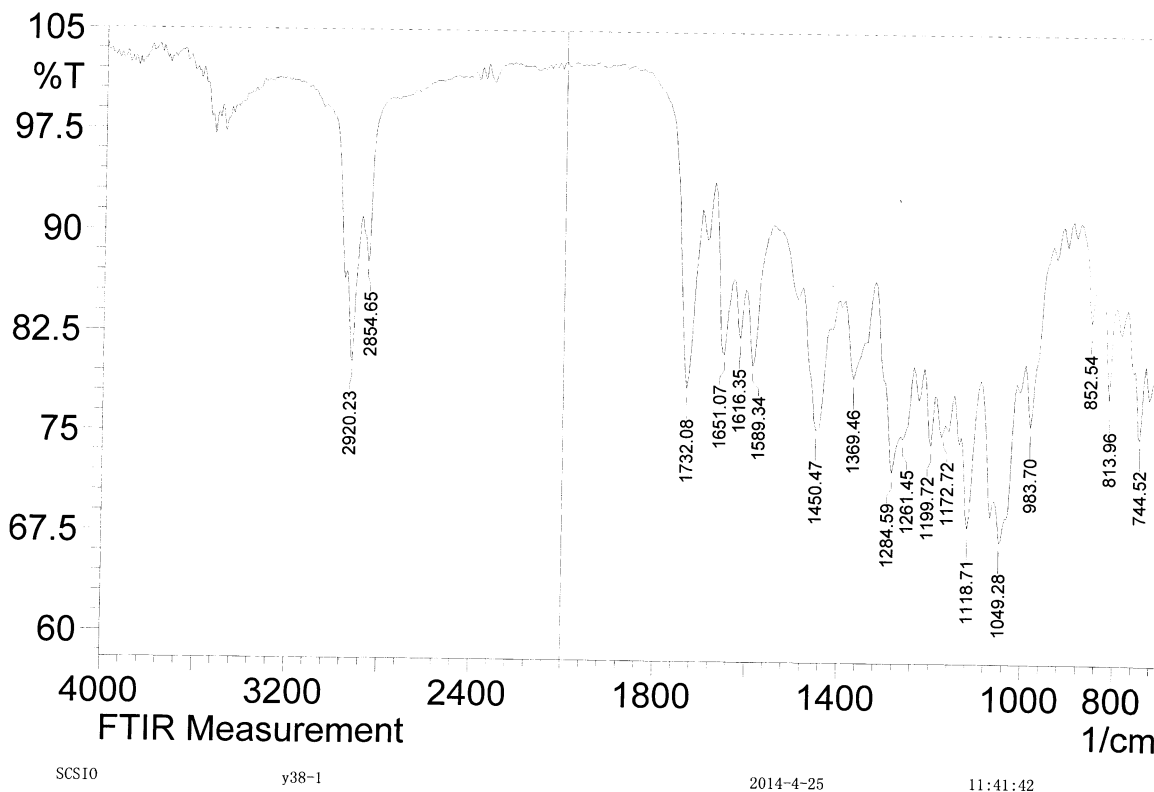



Figure S41. HSQC spectrum of 7.

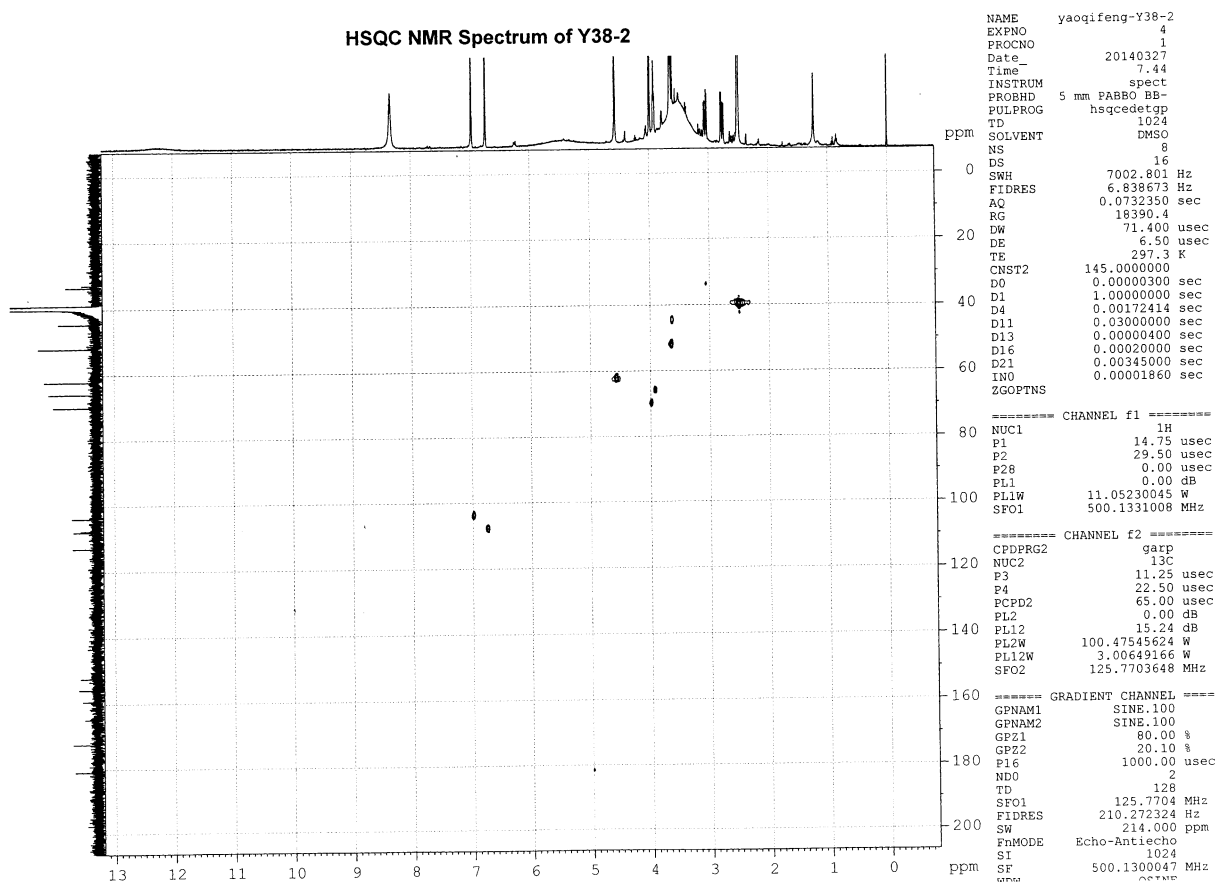

Figure S42. HMBC spectrum of 7.

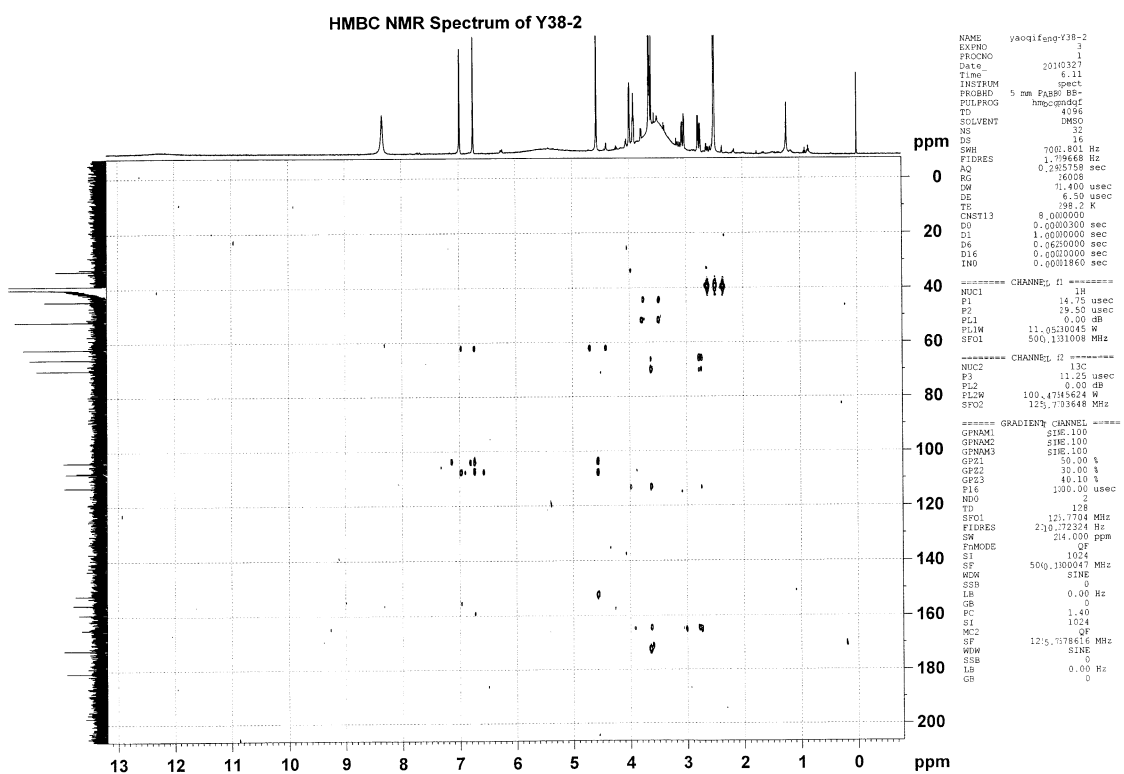

Figure S43. NOESY spectrum of 7.

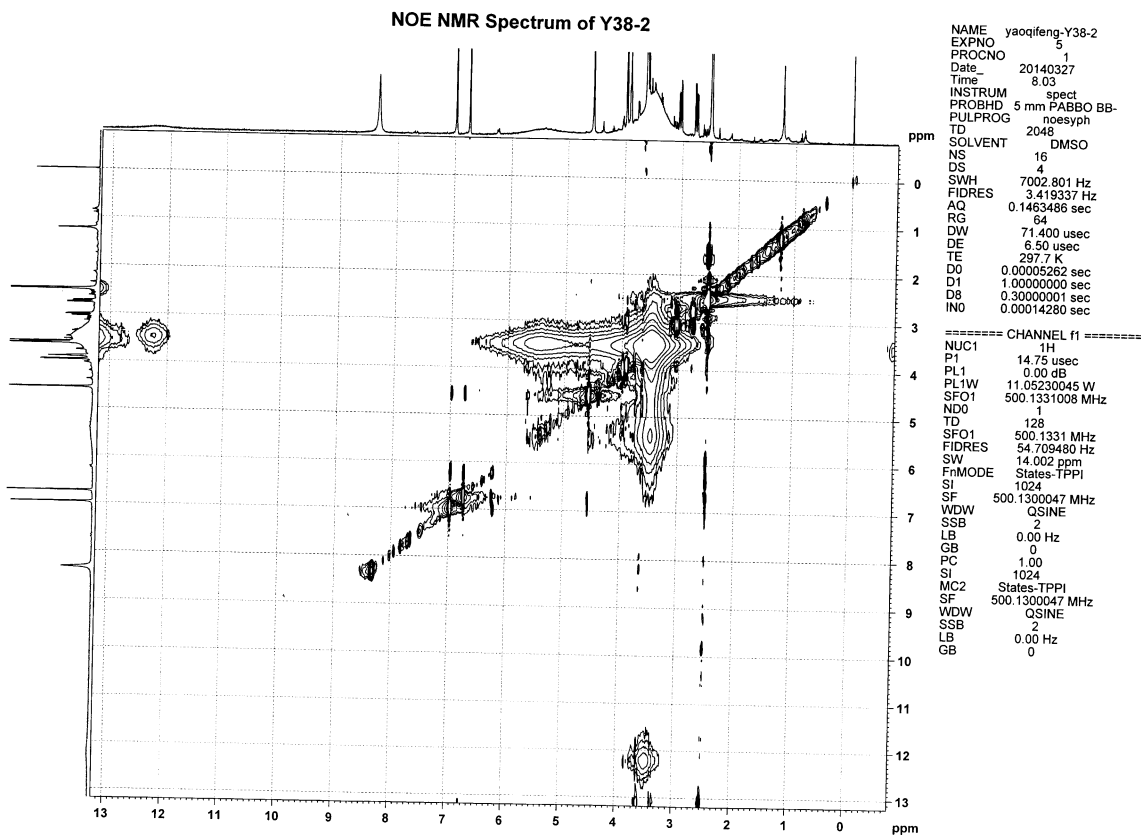

Figure S44. HRESIMS spectrum of 7.

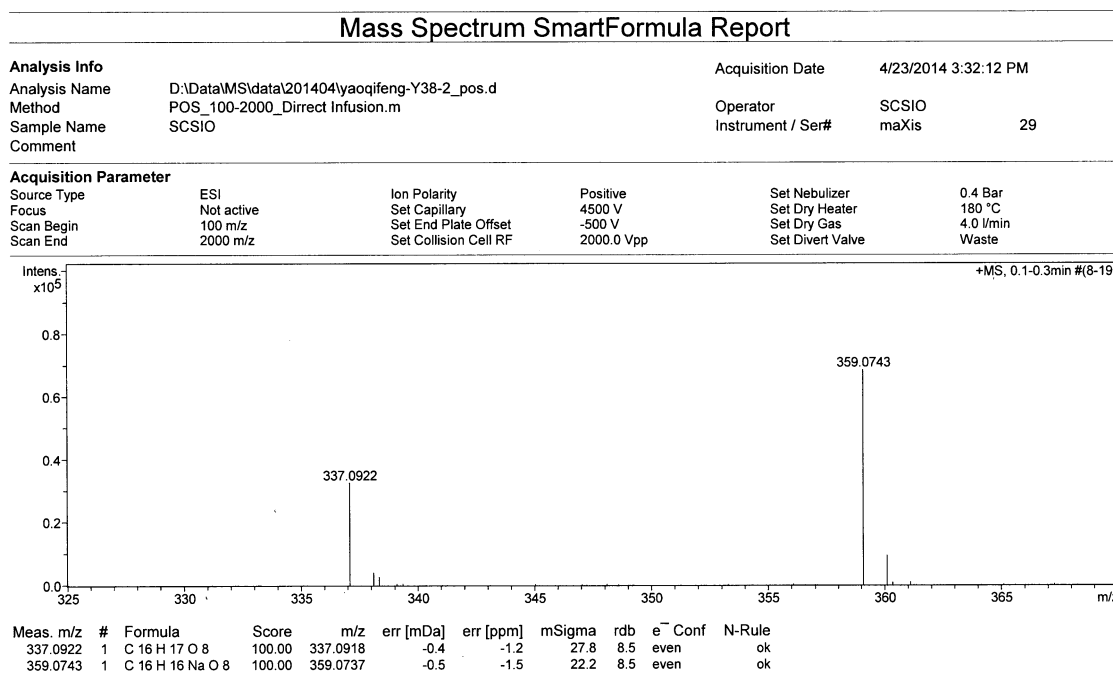



Figure S45. IR spectrum of 7.

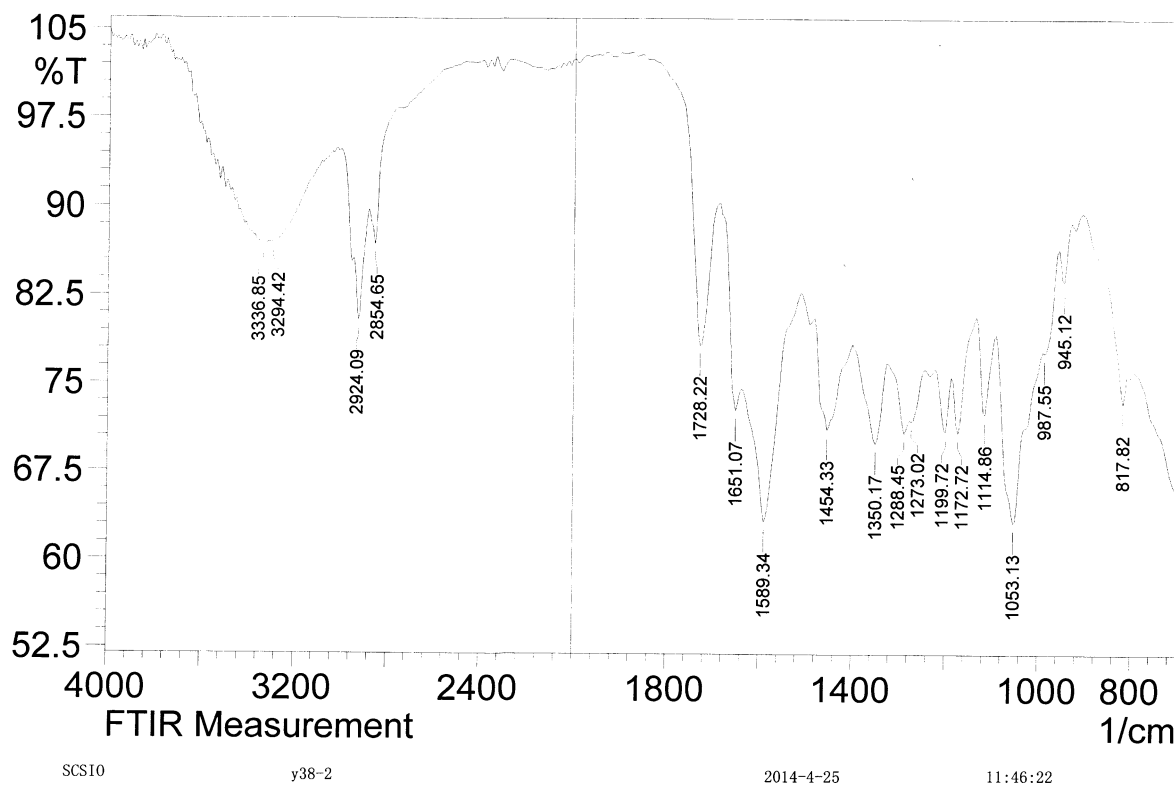

Figure S46. <sup>1</sup>H NMR spectrum of 8.

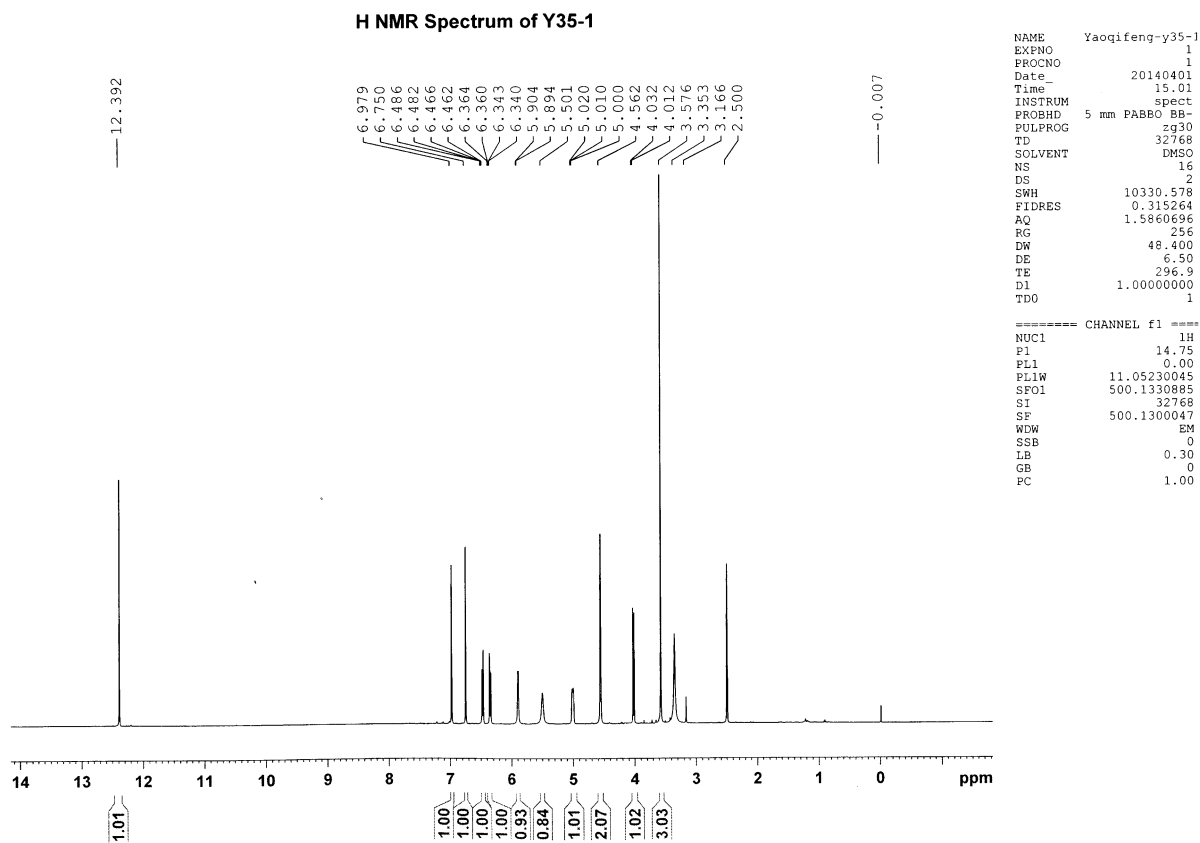

Figure S47. <sup>13</sup>C NMR spectrum of 8.

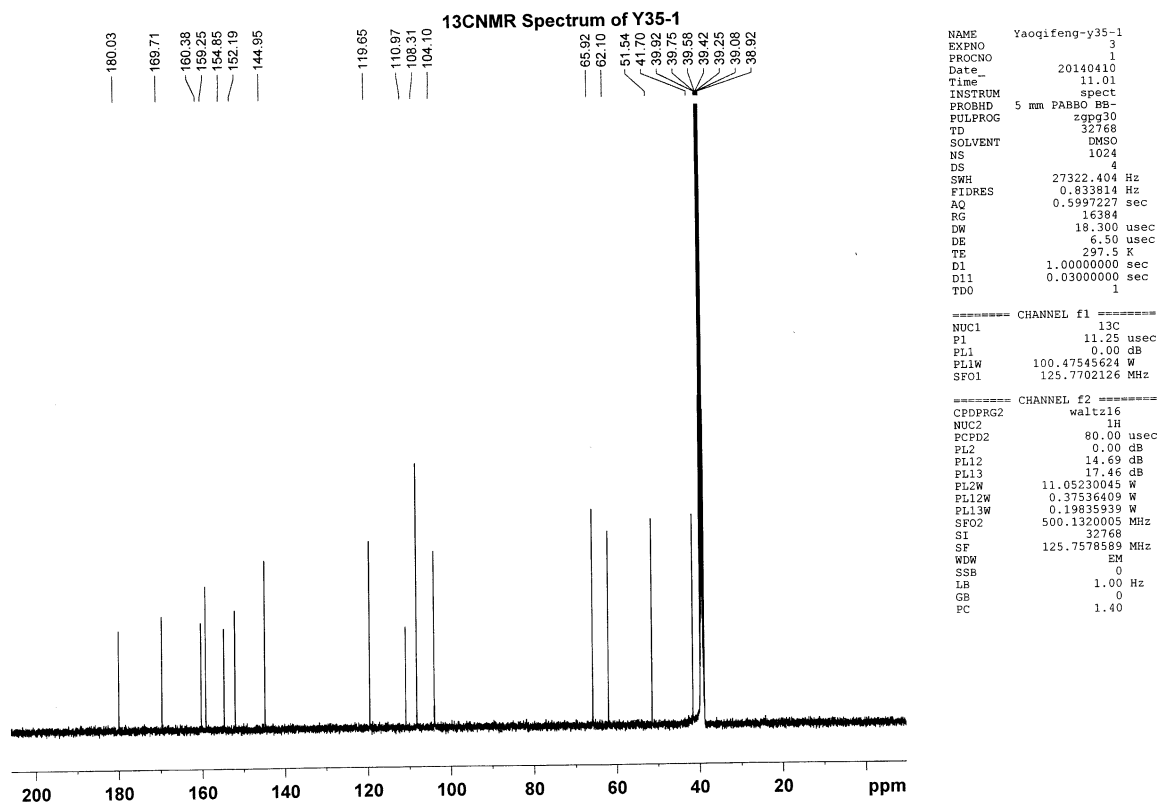

Figure S48. HMBC spectrum of 8.

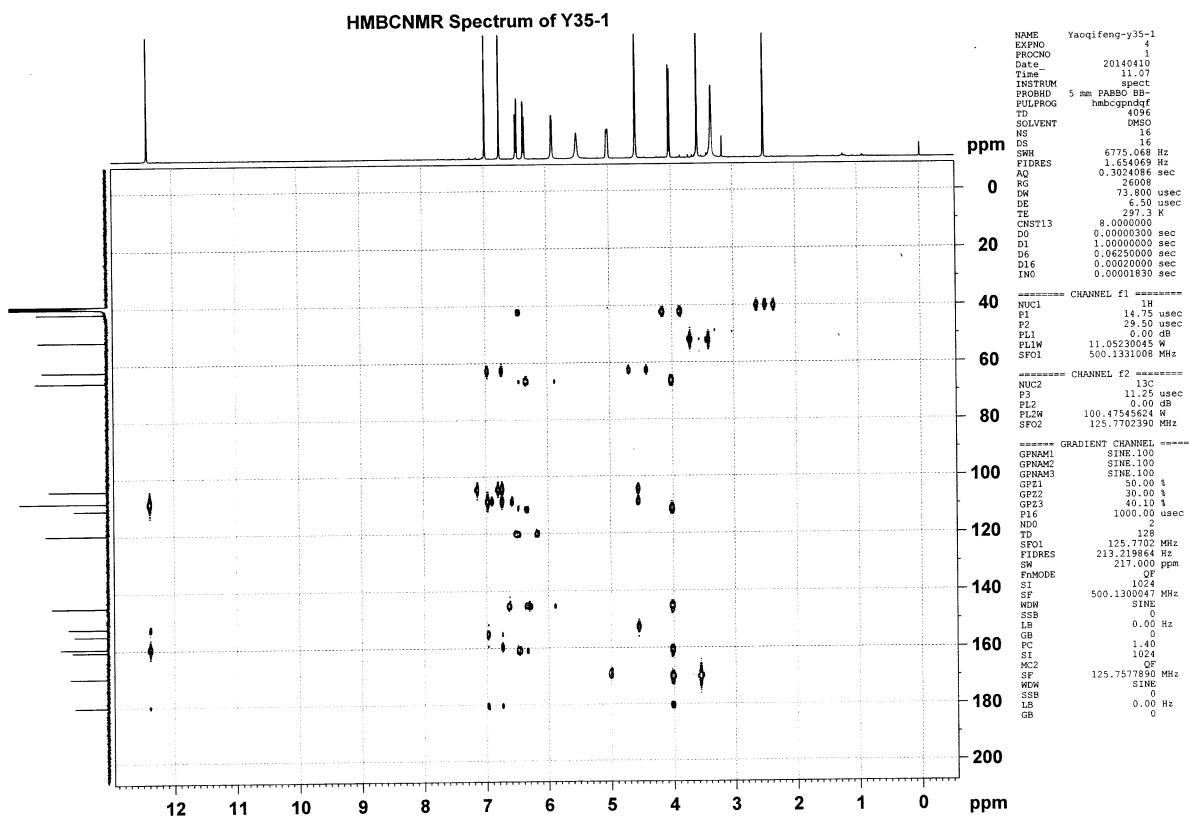

Figure S49. NOESY spectrum of 8.

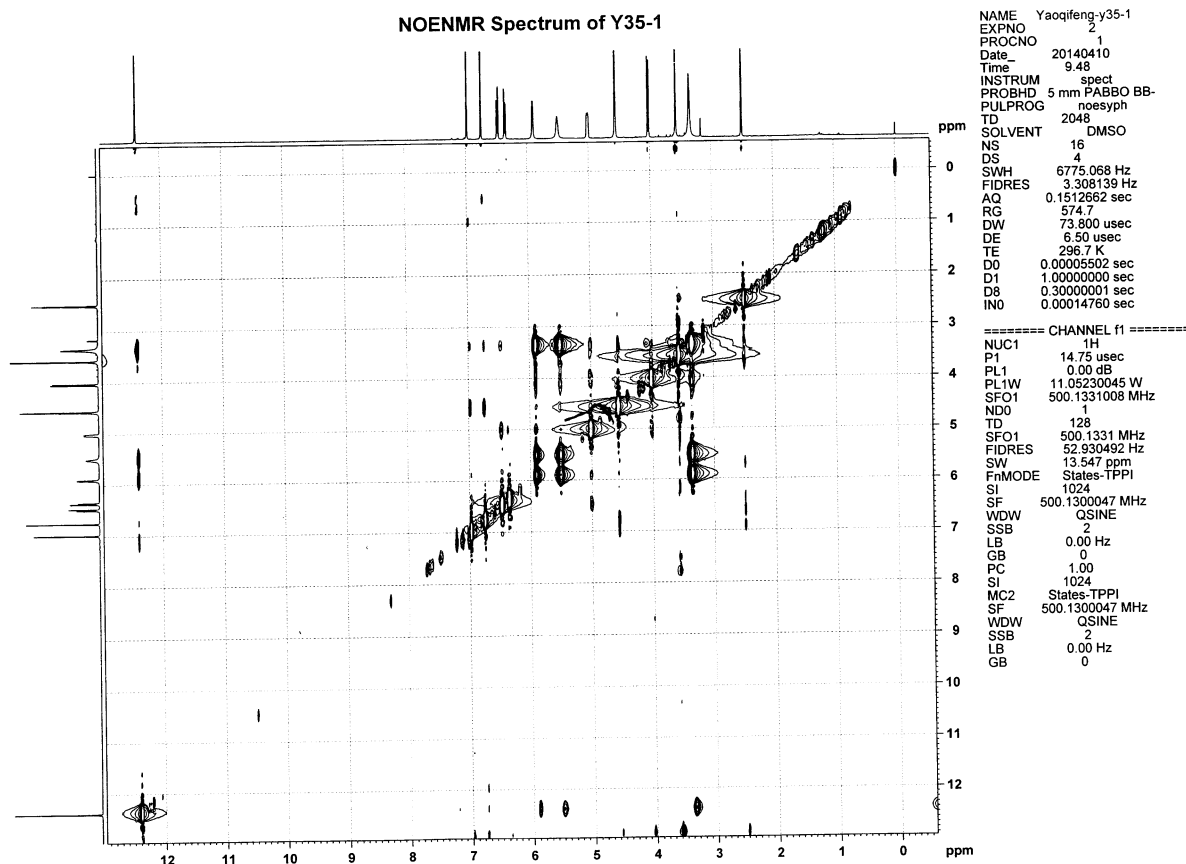

Figure S50. HRESIMS spectrum of 8.

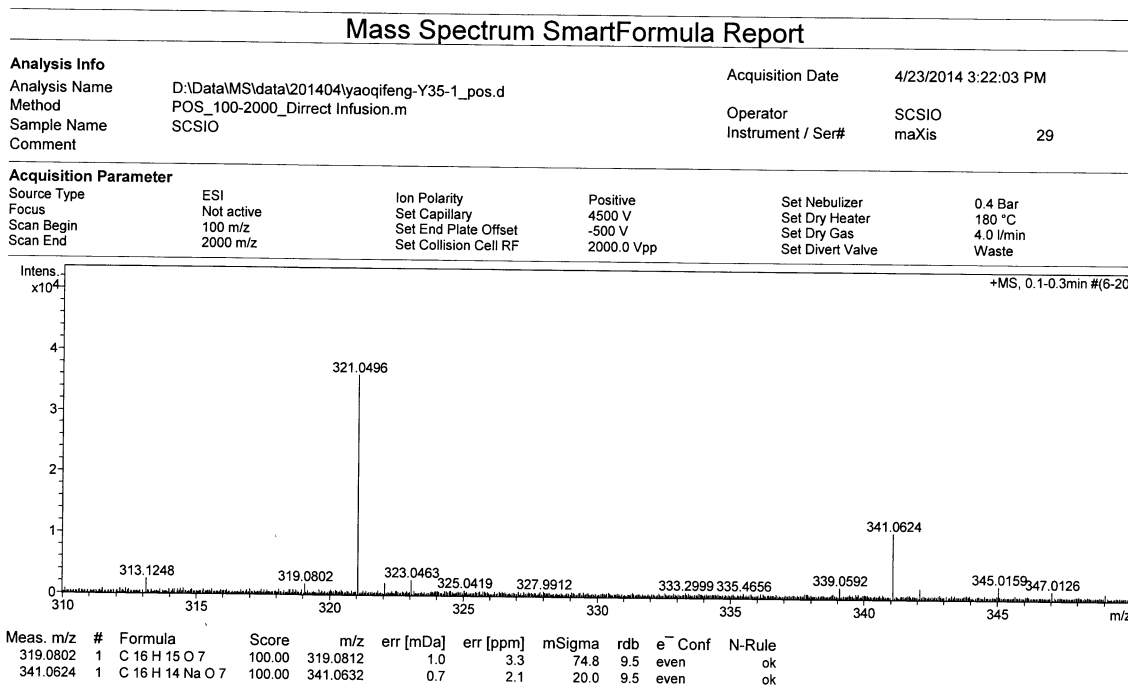

Figure S51. IR spectrum of 8.

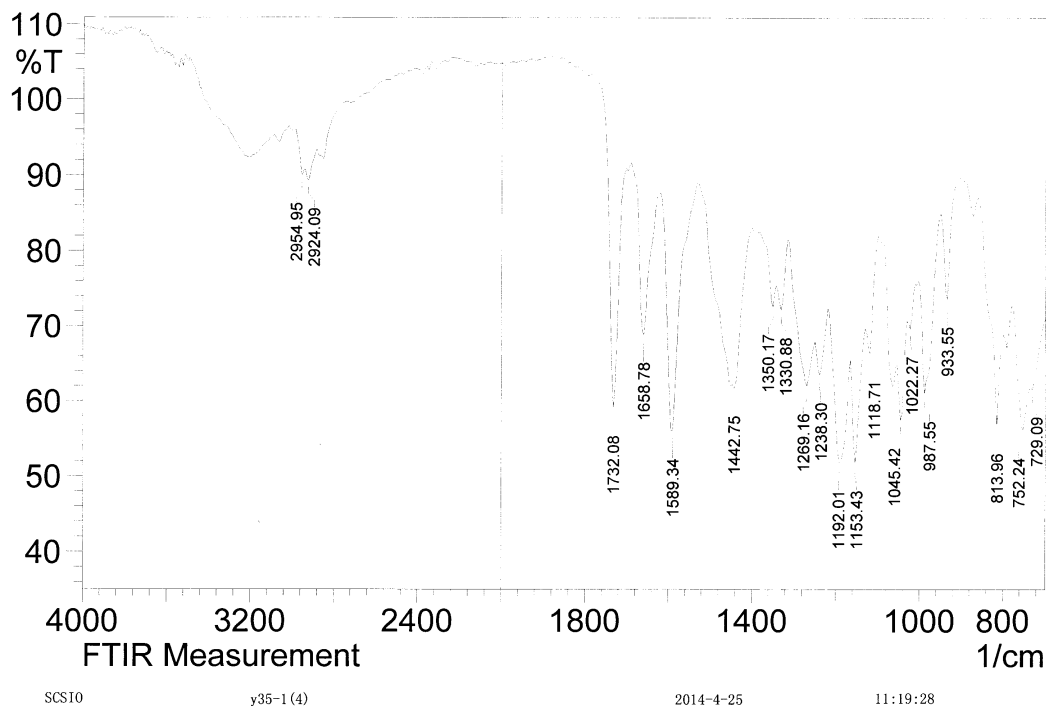

Figure S52. <sup>1</sup>H NMR spectrum of 9.

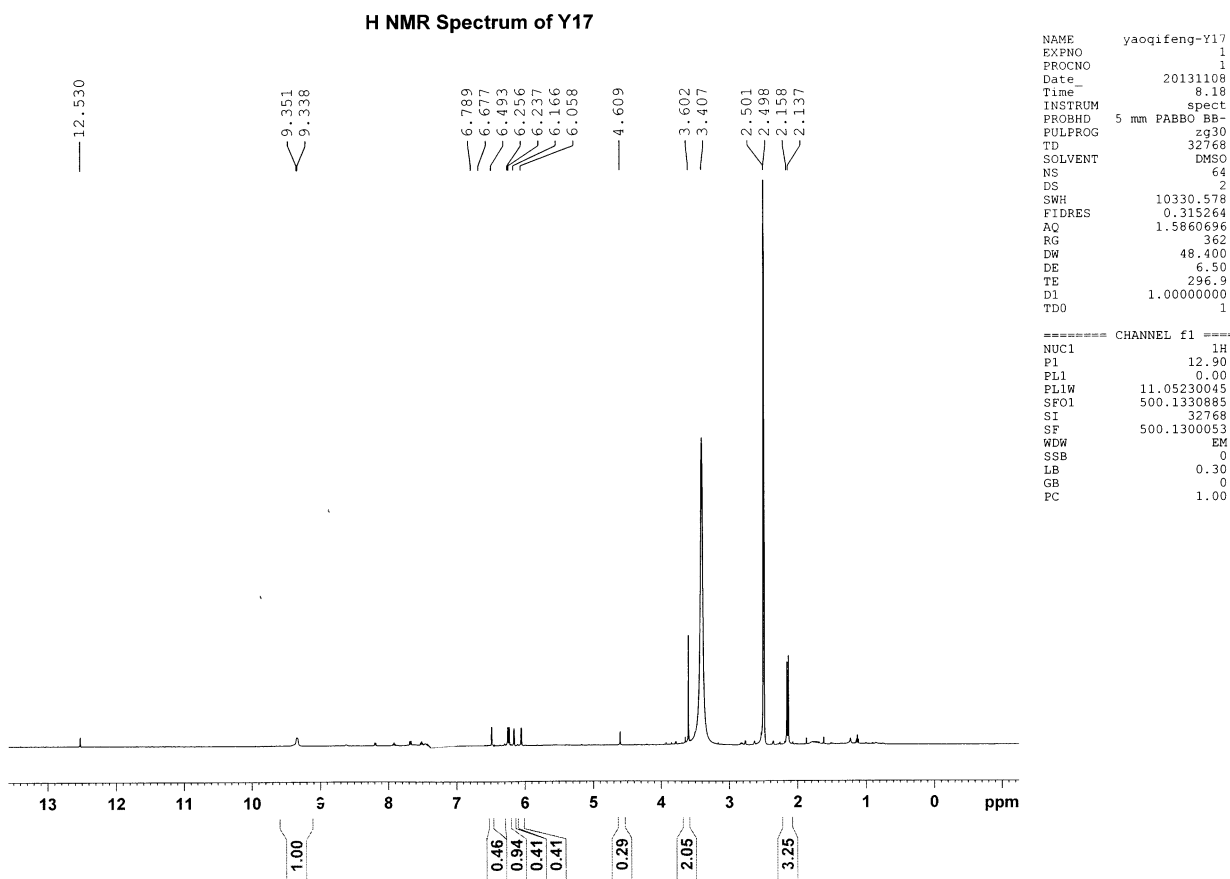

Figure S53. <sup>13</sup>C NMR spectrum of 9.

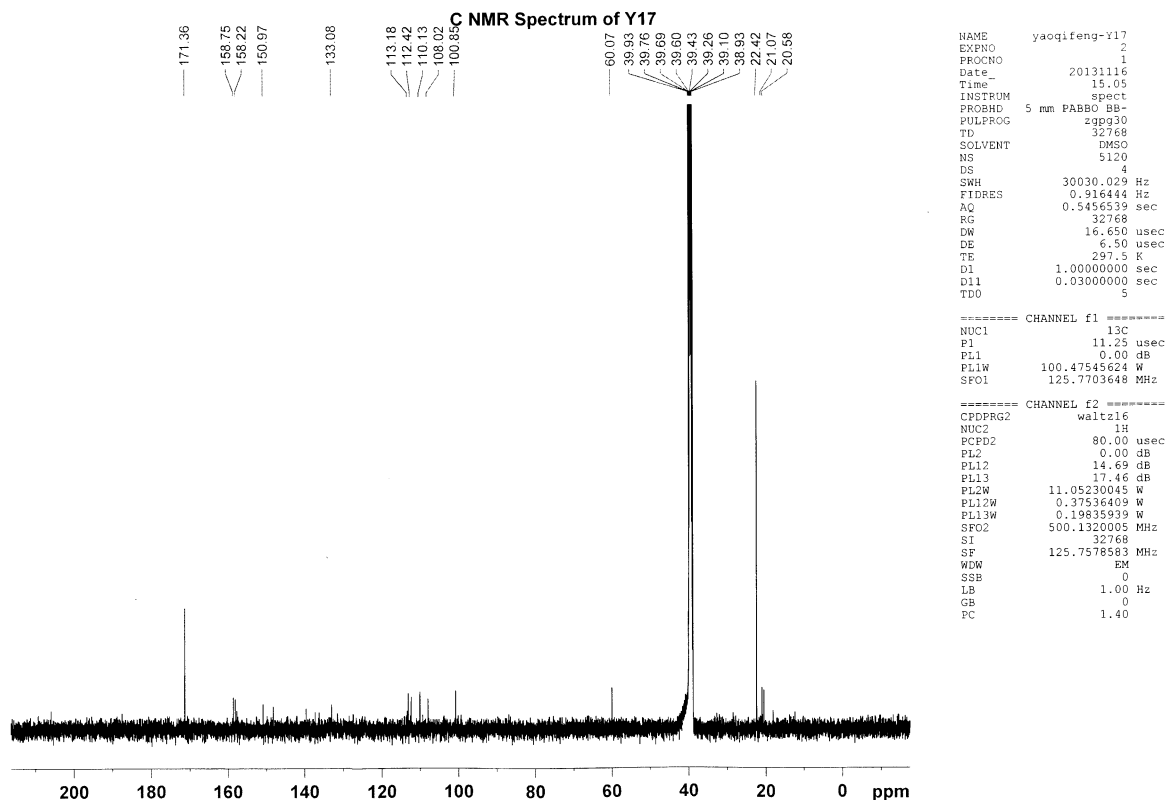

Figure S54. HMBC spectrum of 9.

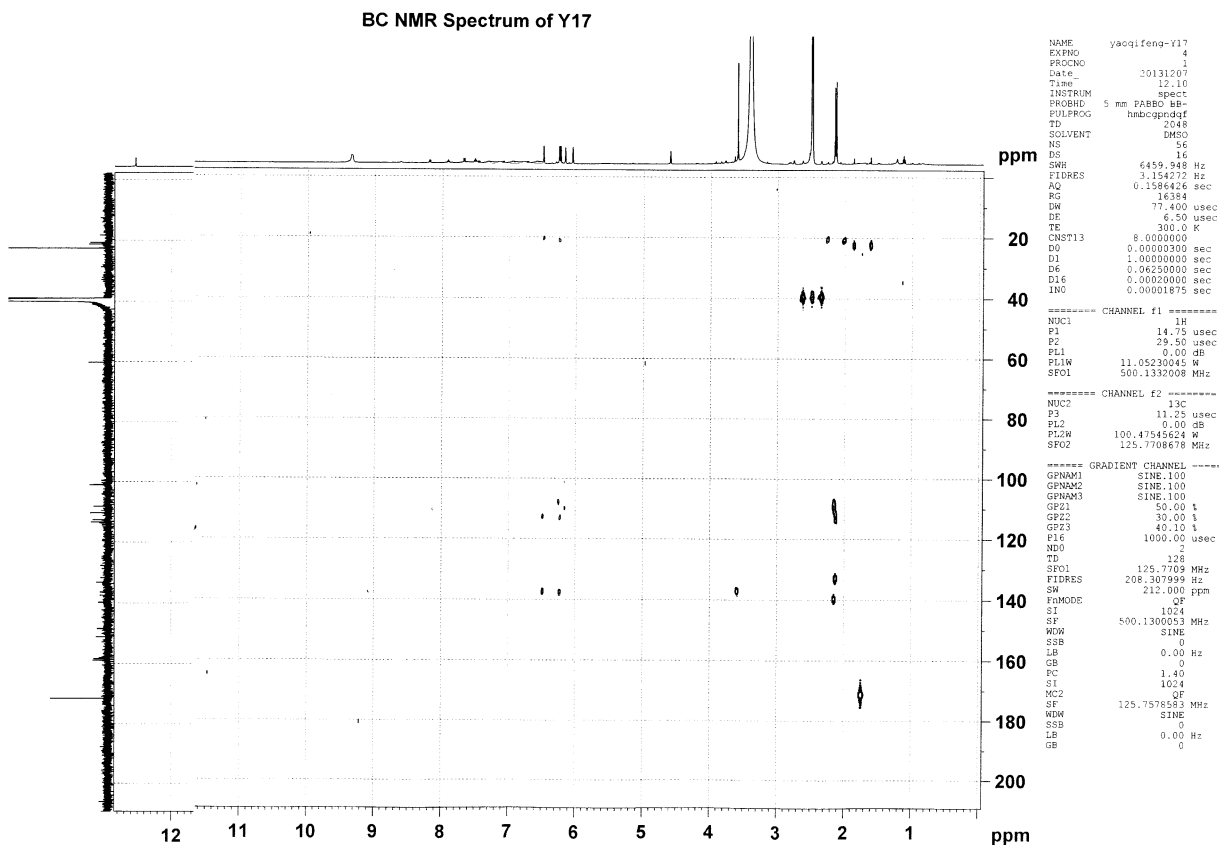

Figure S55. HRESIMS spectrum of 9.

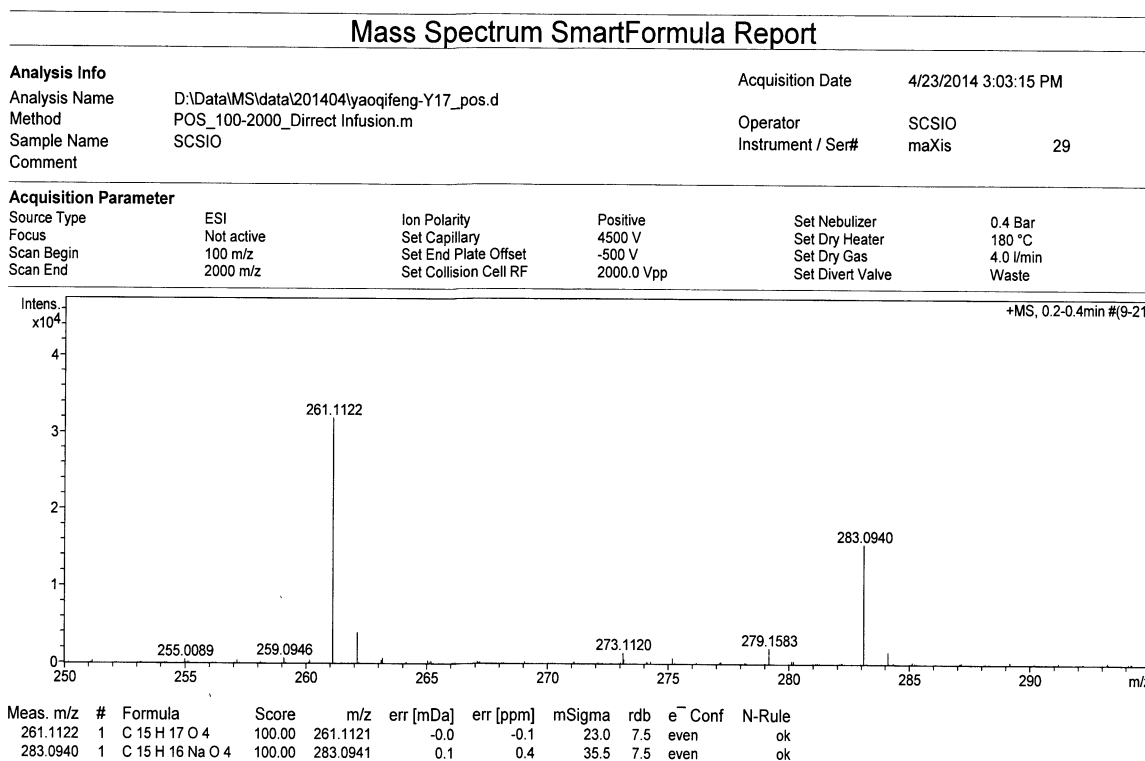

Figure S56. IR spectrum of 9.

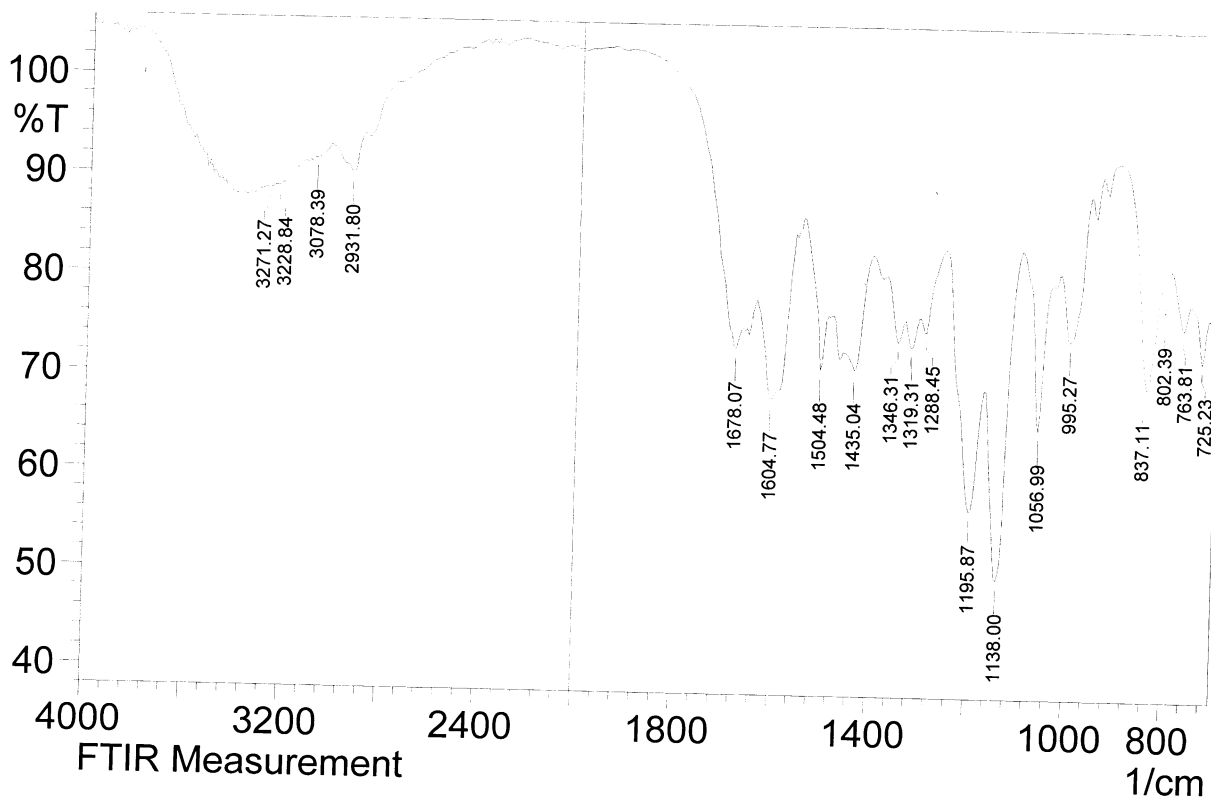

Figure S57. <sup>1</sup>H NMR spectrum of 10.

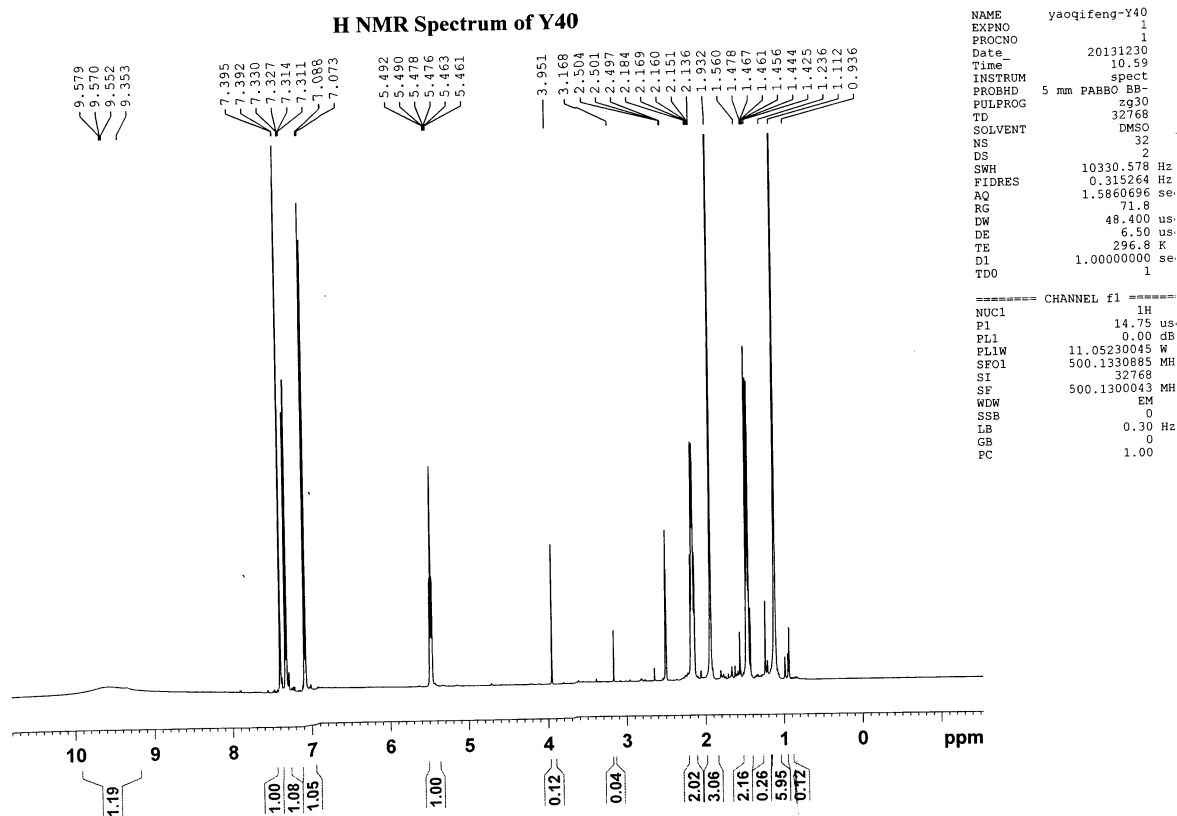

Figure S58. <sup>13</sup>C NMR spectrum of 10.

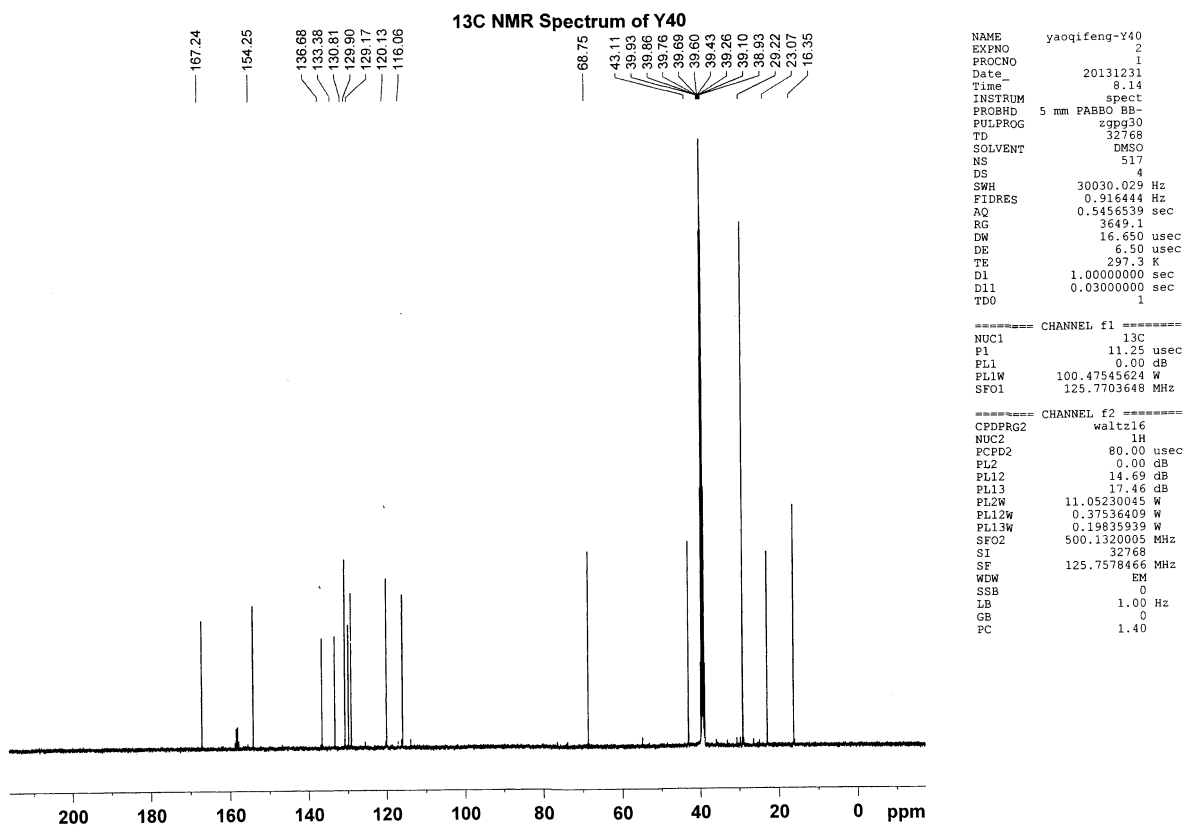

Figure S59. HMBC spectrum of 10.

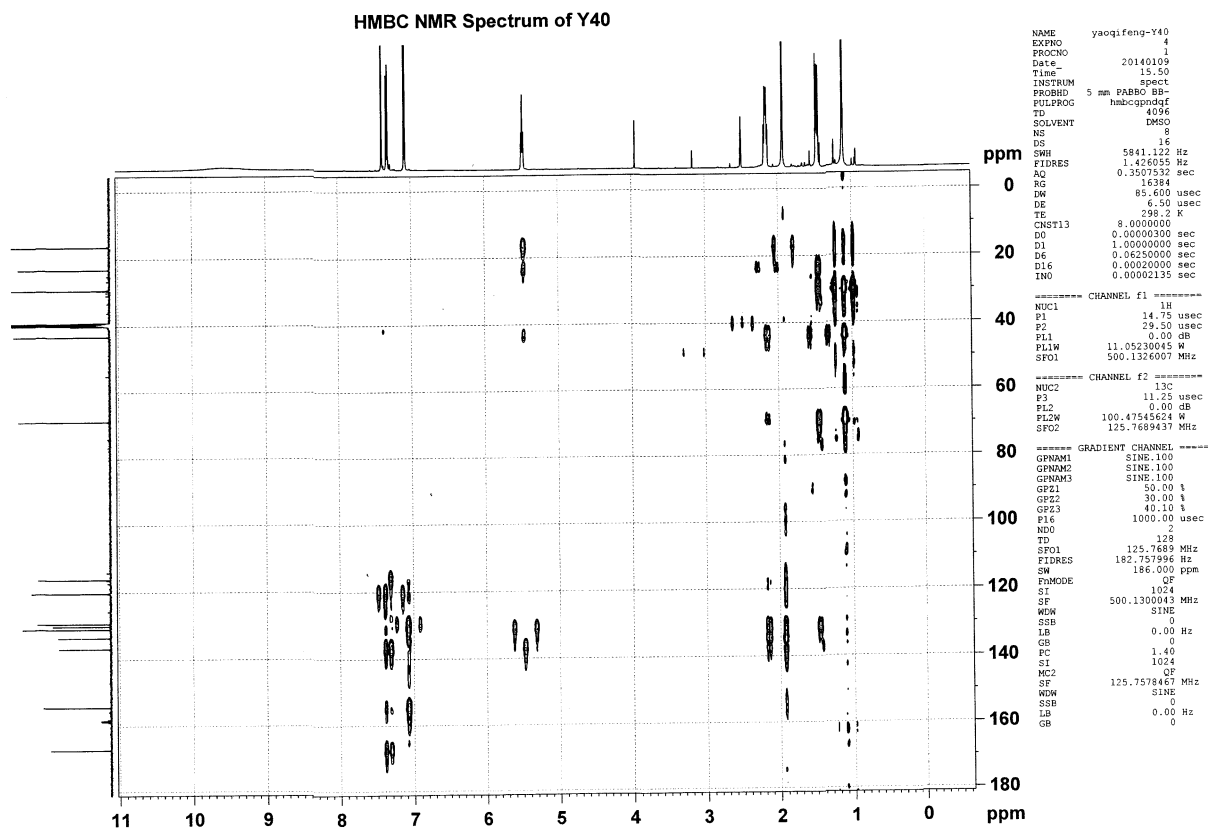

Figure S60. H-H COSY spectrum of 10.

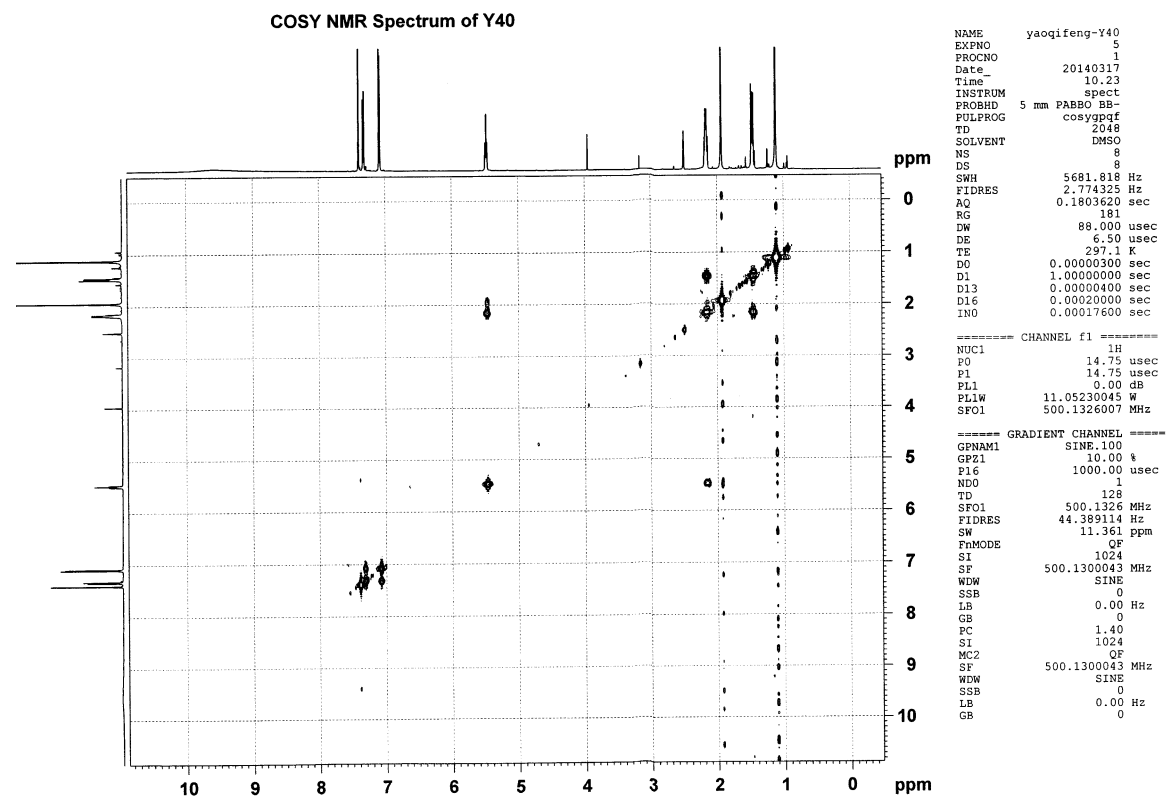



Figure S61. HRESIMS spectrum of 10.

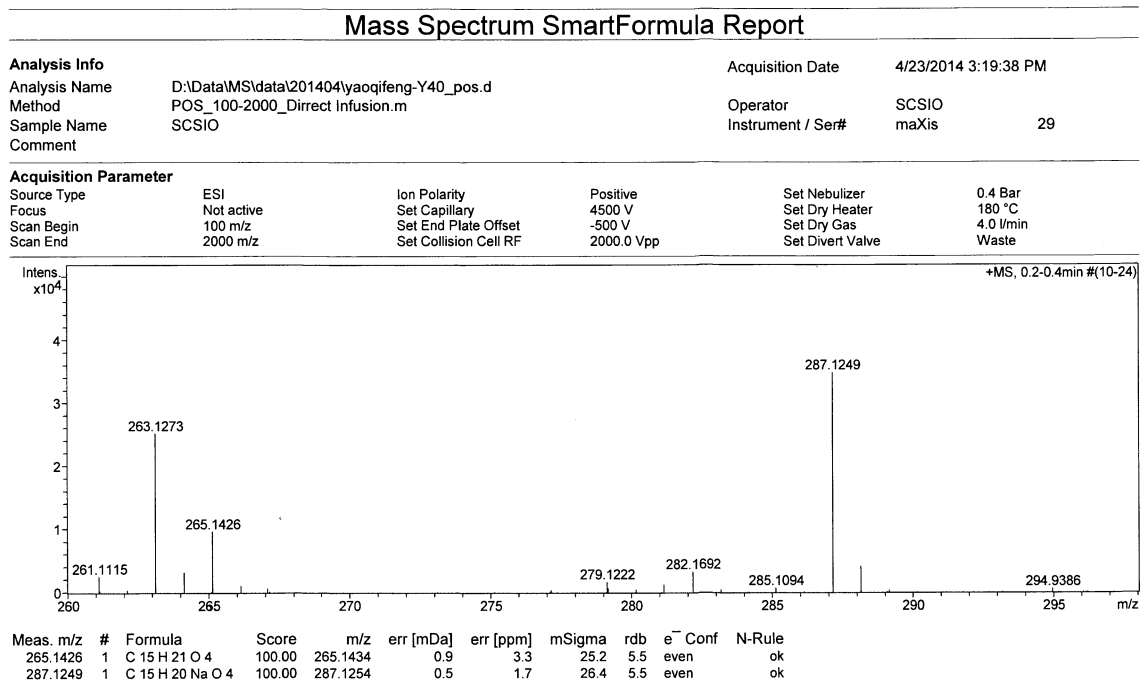

Figure S62. IR spectrum of 10.

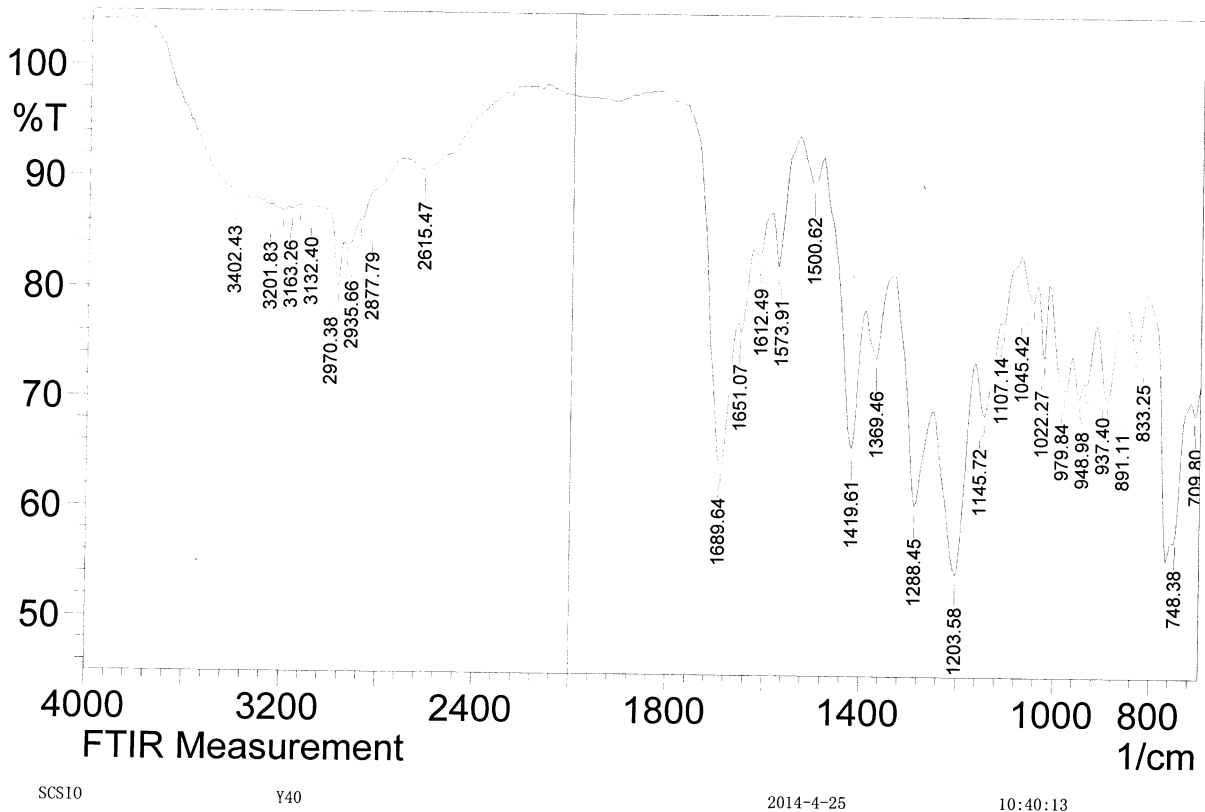

Figure S63. <sup>1</sup>H NMR spectrum of 11.

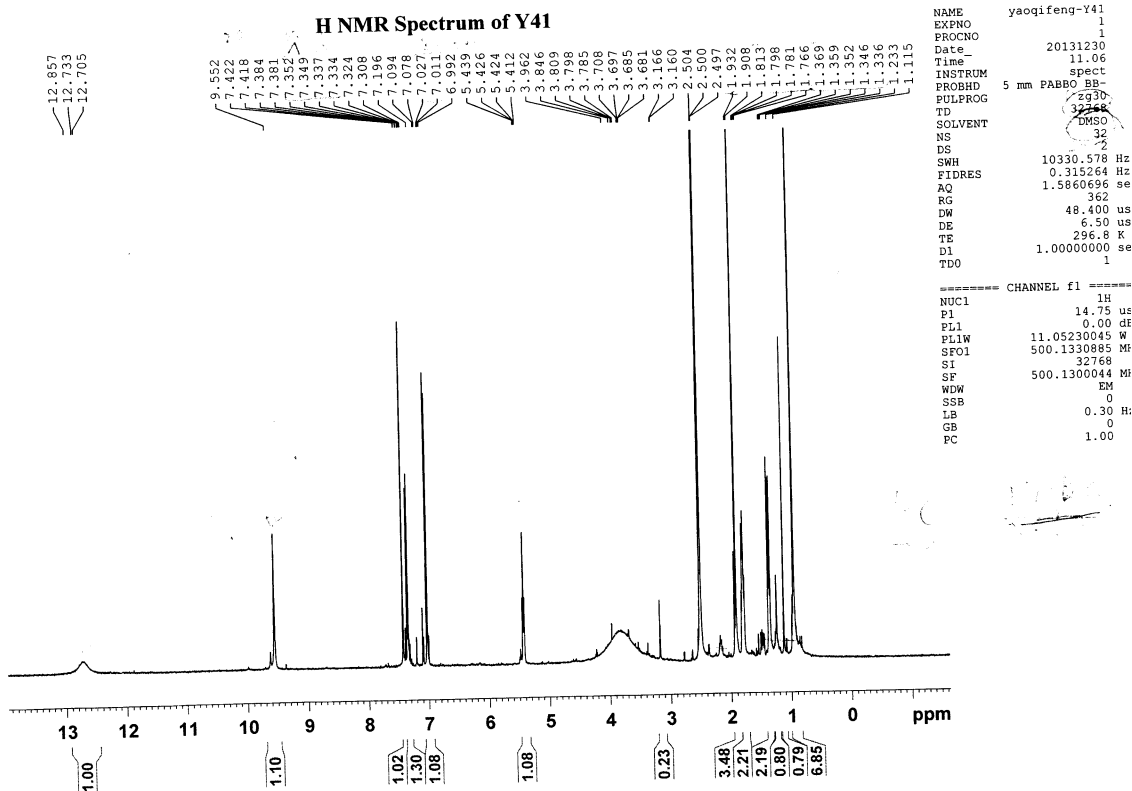

Figure S64. <sup>13</sup>C NMR spectrum of 11.

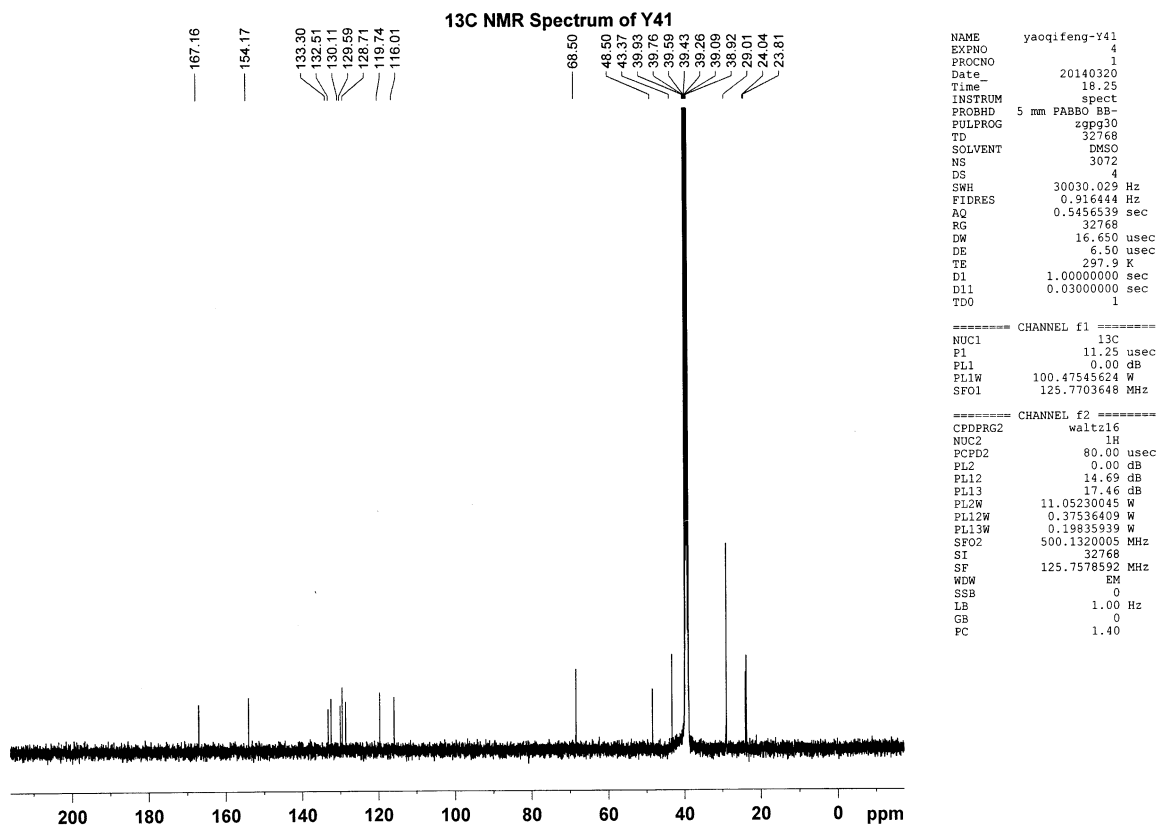

Figure S65. HMBC spectrum of 11.

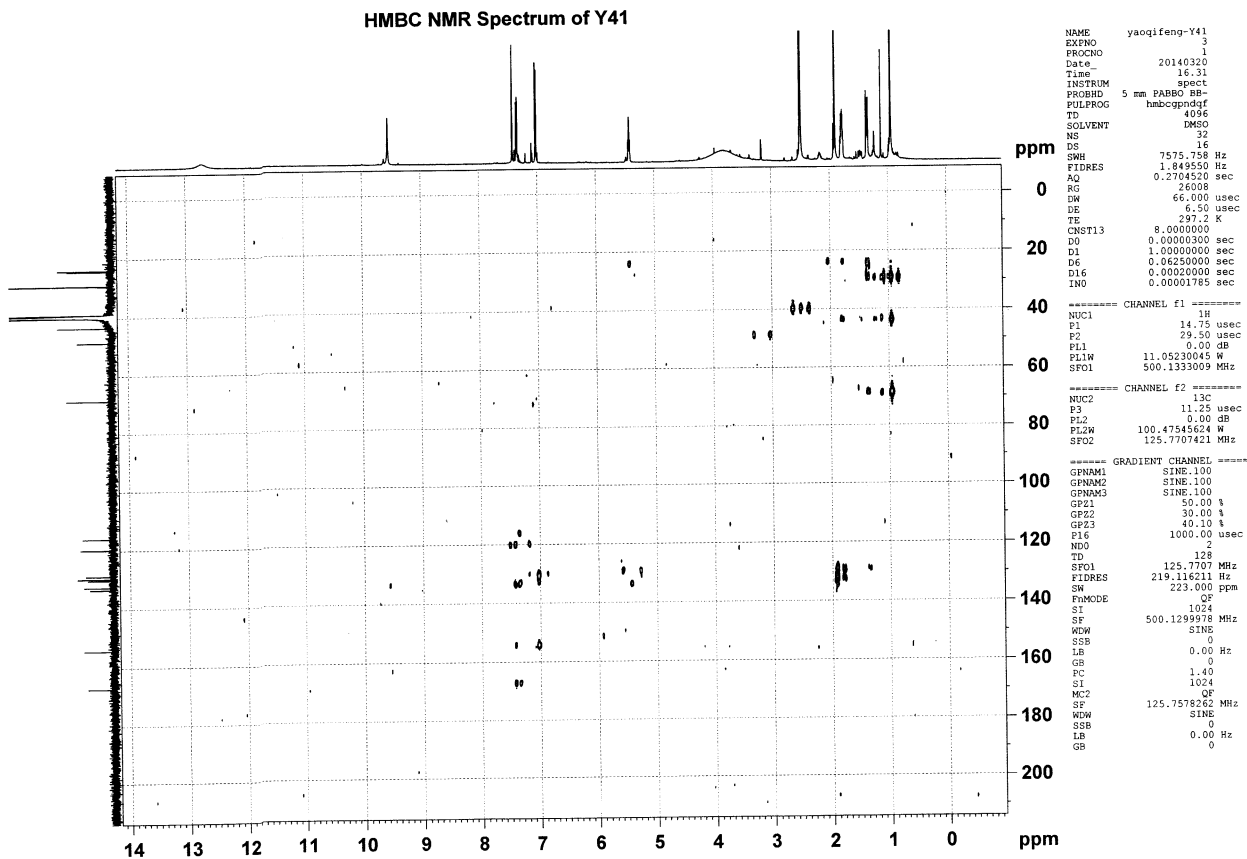

Figure S66. HRESIMS spectrum of 11.

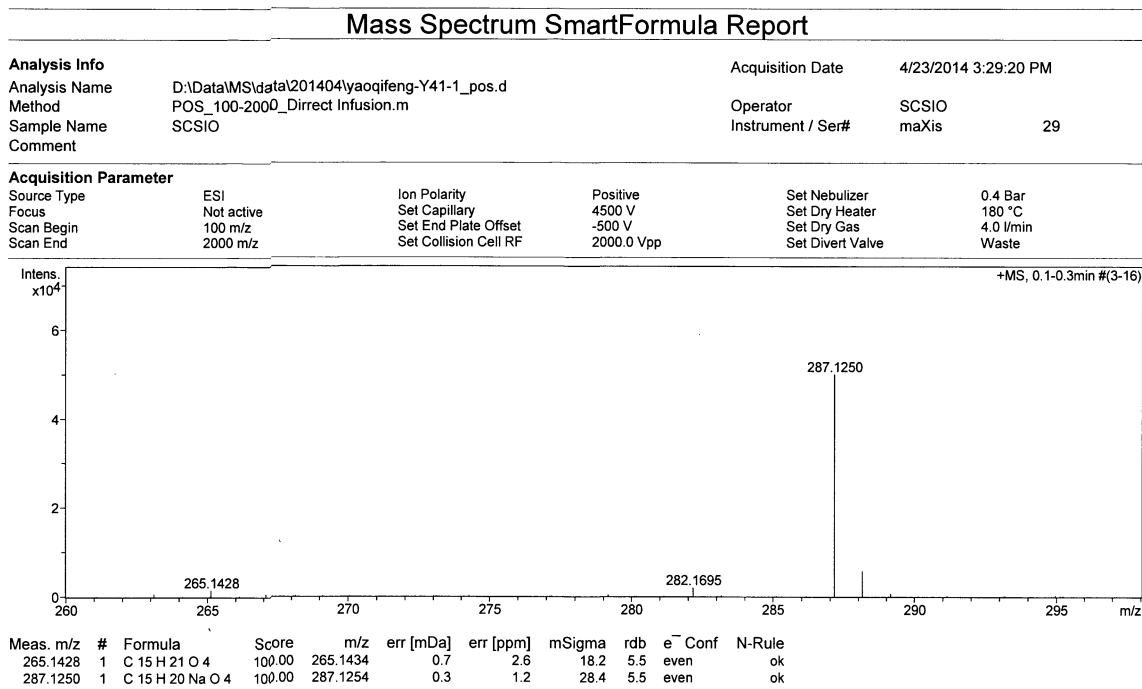

Figure S67. IR spectrum of 11.

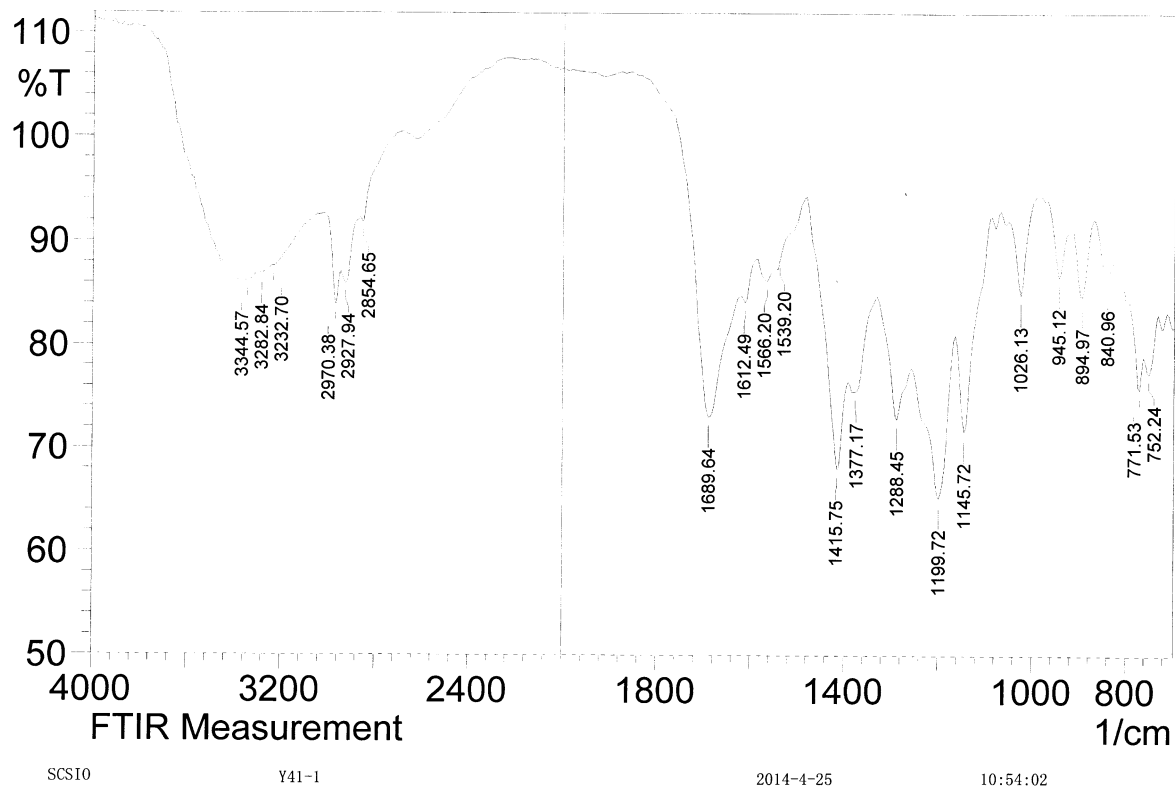

**Figure S68.** HPLC analysis of compound **5** on a chiral column OD-H (Daicel corporation, Osaka, Japan) (IPA/ n-hexane 30:70) and a C18 column (impurity substance was brought in after several transfer). **(a)** HPLC analysis of compound **5** on a chiral column OD-H; **(b)** HPLC analysis of compound **5** on a C18 column.

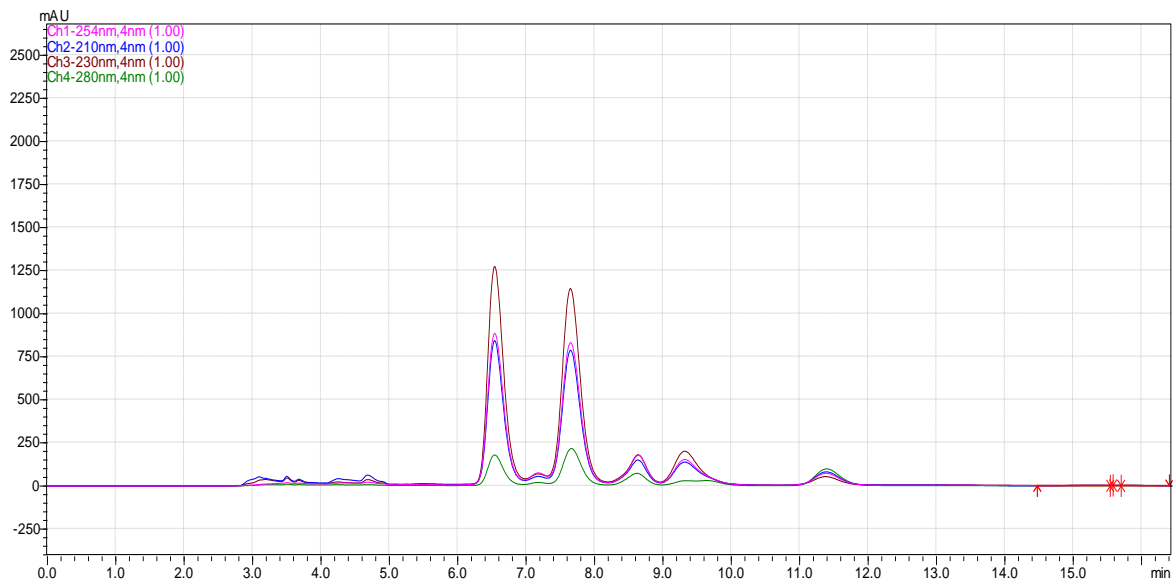

**(a)**

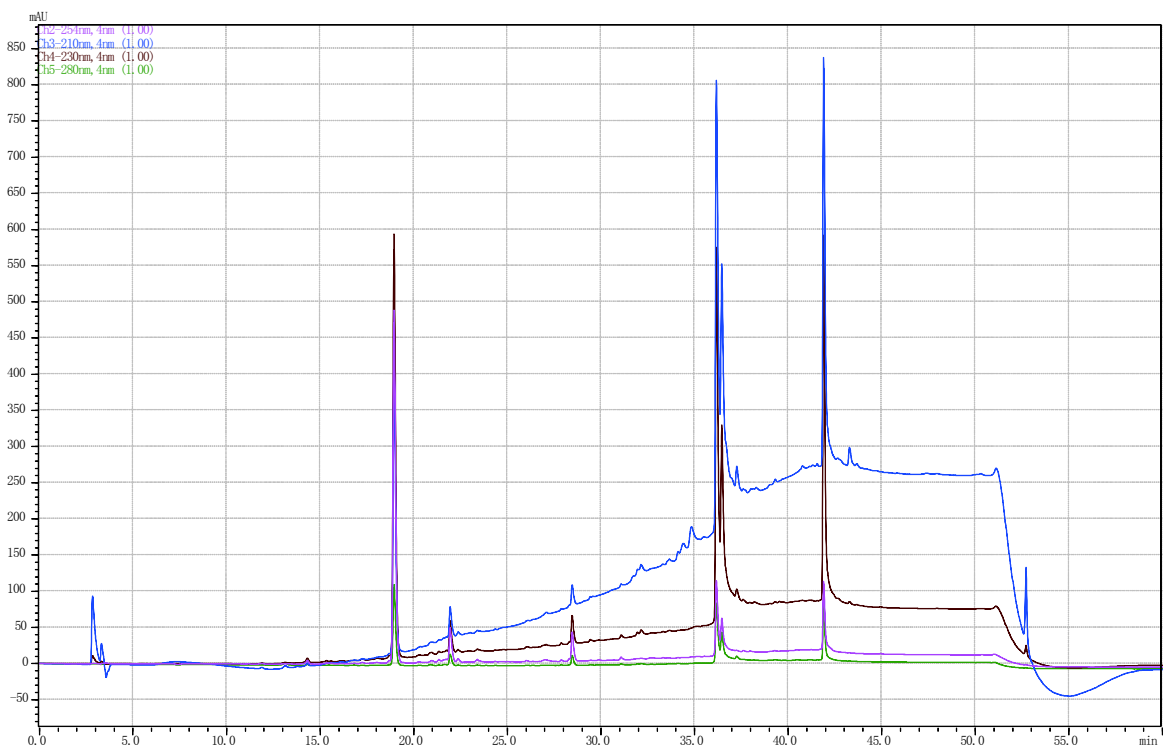

**(b)**

**Figure S69.** HPLC analysis of compound **6** on a chiral column (IPA/ n-hexane 30:70) and a C18 column. (a) HPLC analysis of compound **6** on a chiral column OD-H; (b) HPLC analysis of compound **6** on a C18 column.

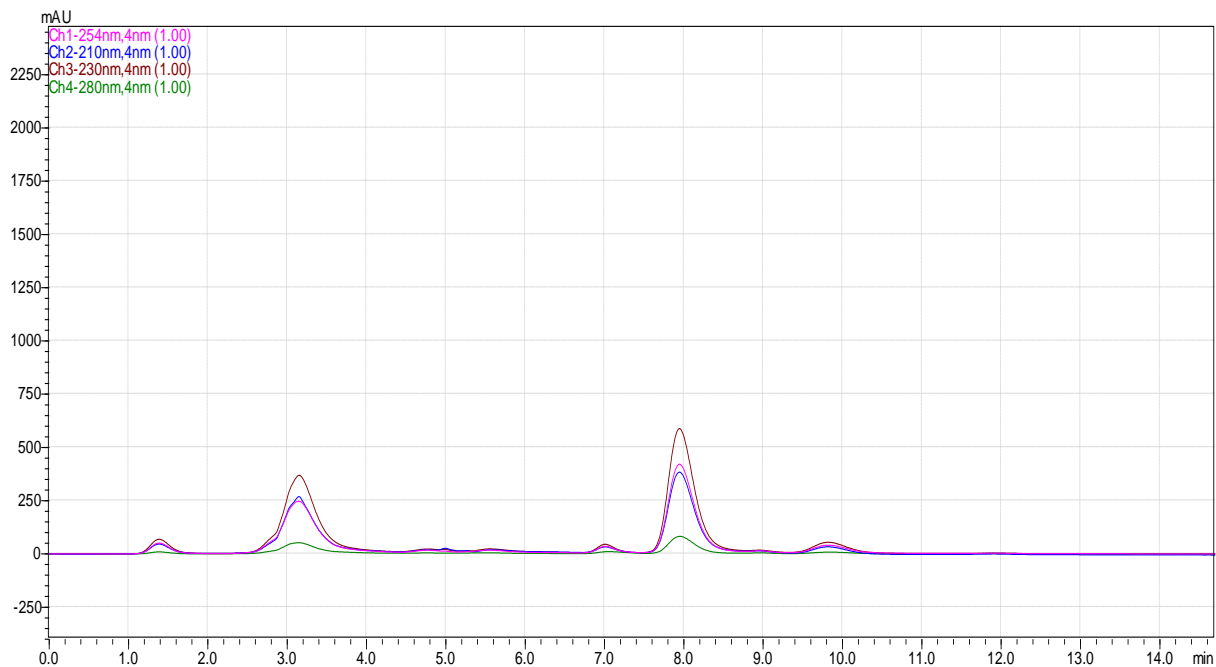

(a)

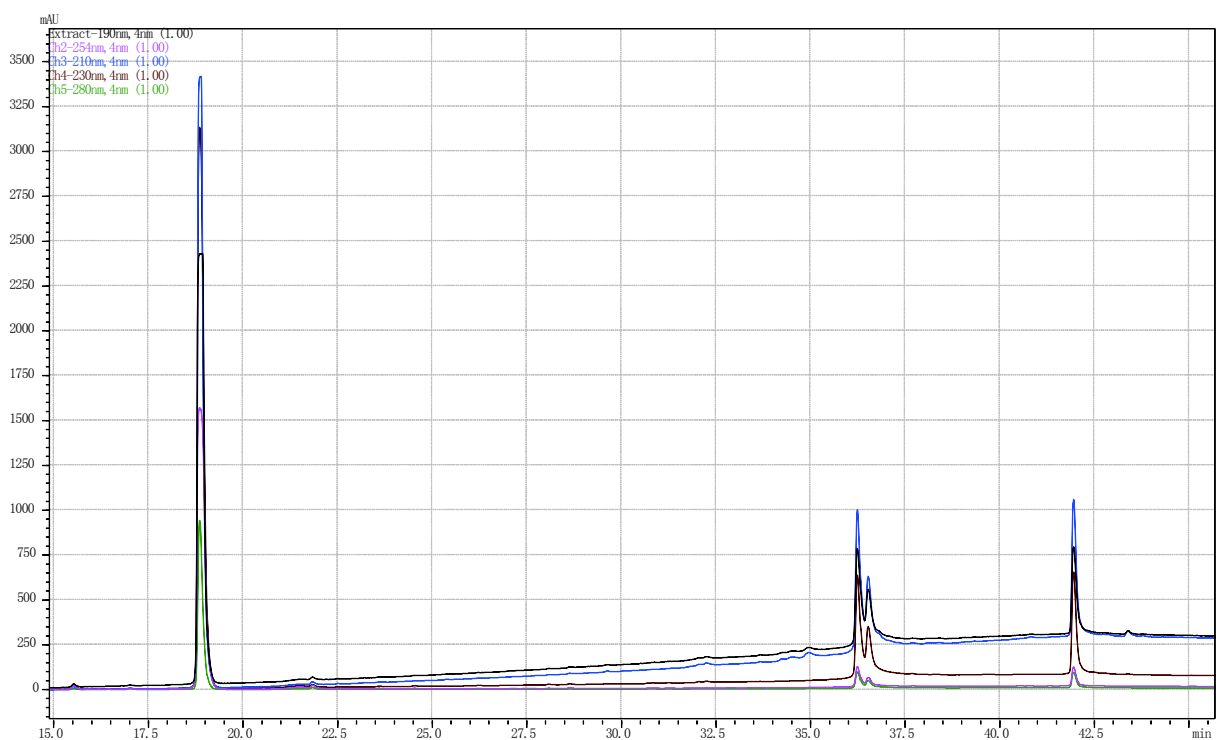

(b)

**Figure S70.** HPLC analysis of compound **7** on a chiral column (IPA/ n-hexane 22:78) and a C18 column (impurity substance was brought in after several transfer). **(a)** HPLC analysis of compound **7** on a chiral column OD-H; **(b)** HPLC analysis of compound **7** on a C18 column.

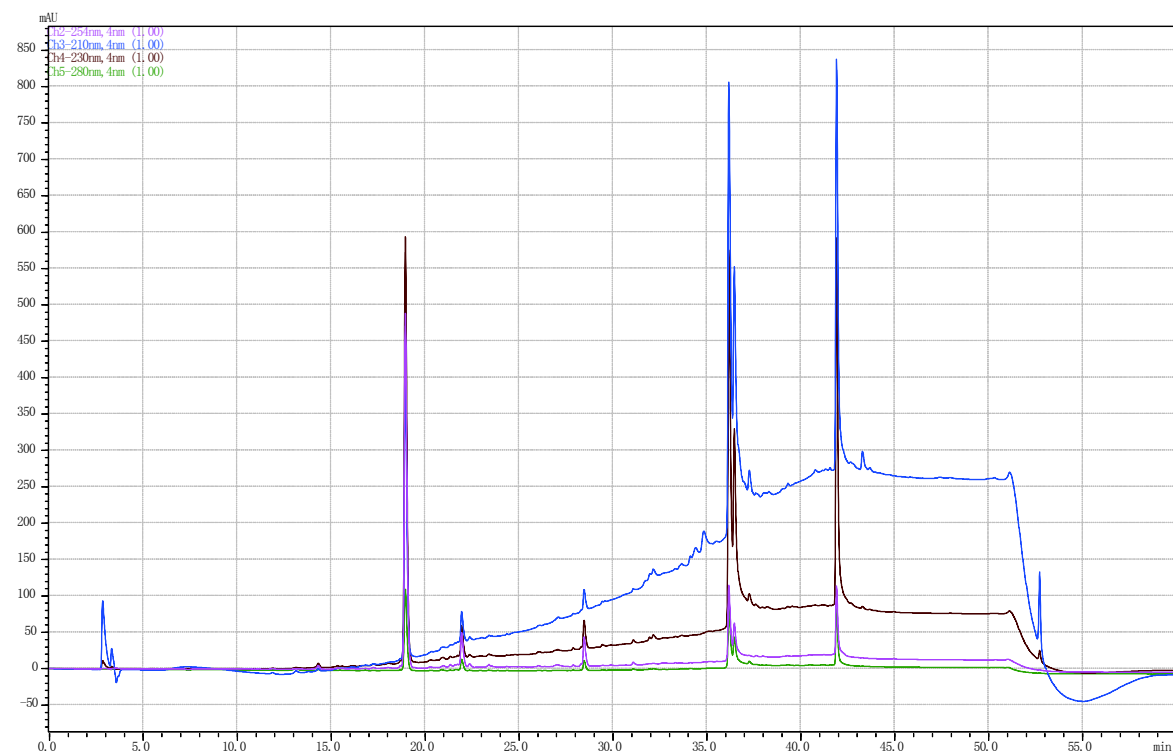

**(a)**

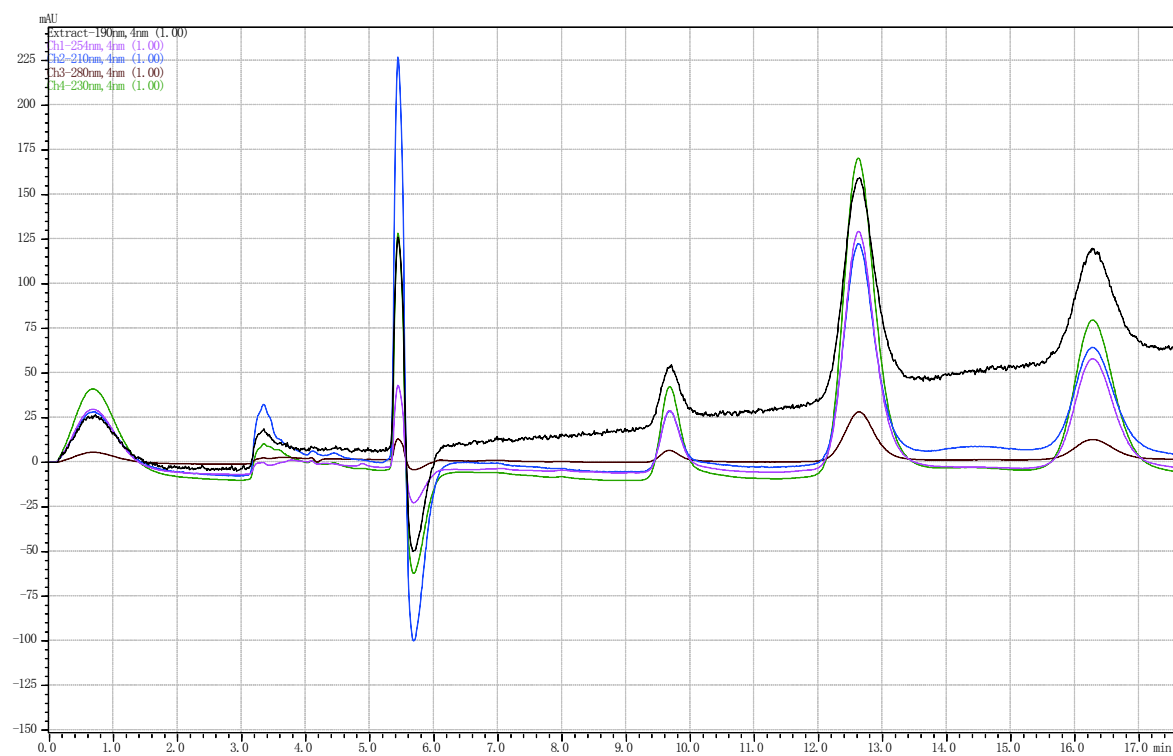

**(b)**

**Figure S71.** Macro- and micro-morphological observations of strain DFFSCS021.

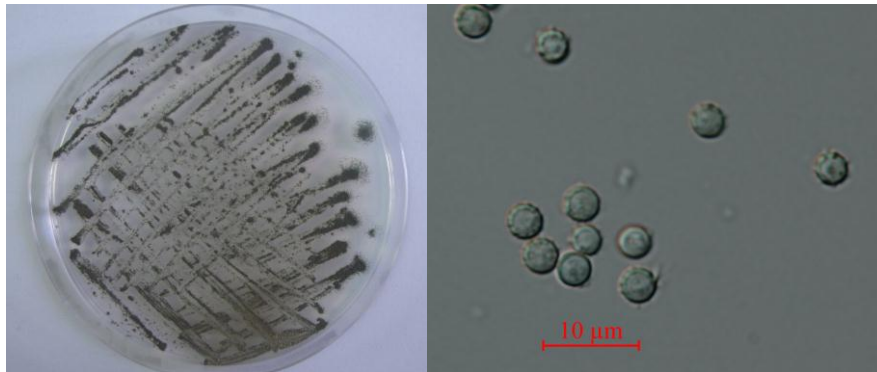

© 2014 by the authors; licensee MDPI, Basel, Switzerland. This article is an open access article distributed under the terms and conditions of the Creative Commons Attribution license (<http://creativecommons.org/licenses/by/4.0/>).
